# Supplementary material for: Beyond MAGT: learning more from permafrost thermal monitoring data with additional metrics
Source: Copernicus journal article supplement (doi:10.5194/egusphere-2025-2658), 2025-08-06
Supplement: Supplementary file 1 [file Figures_S1-S36.pdf › Figures_S1-S36.pdf]

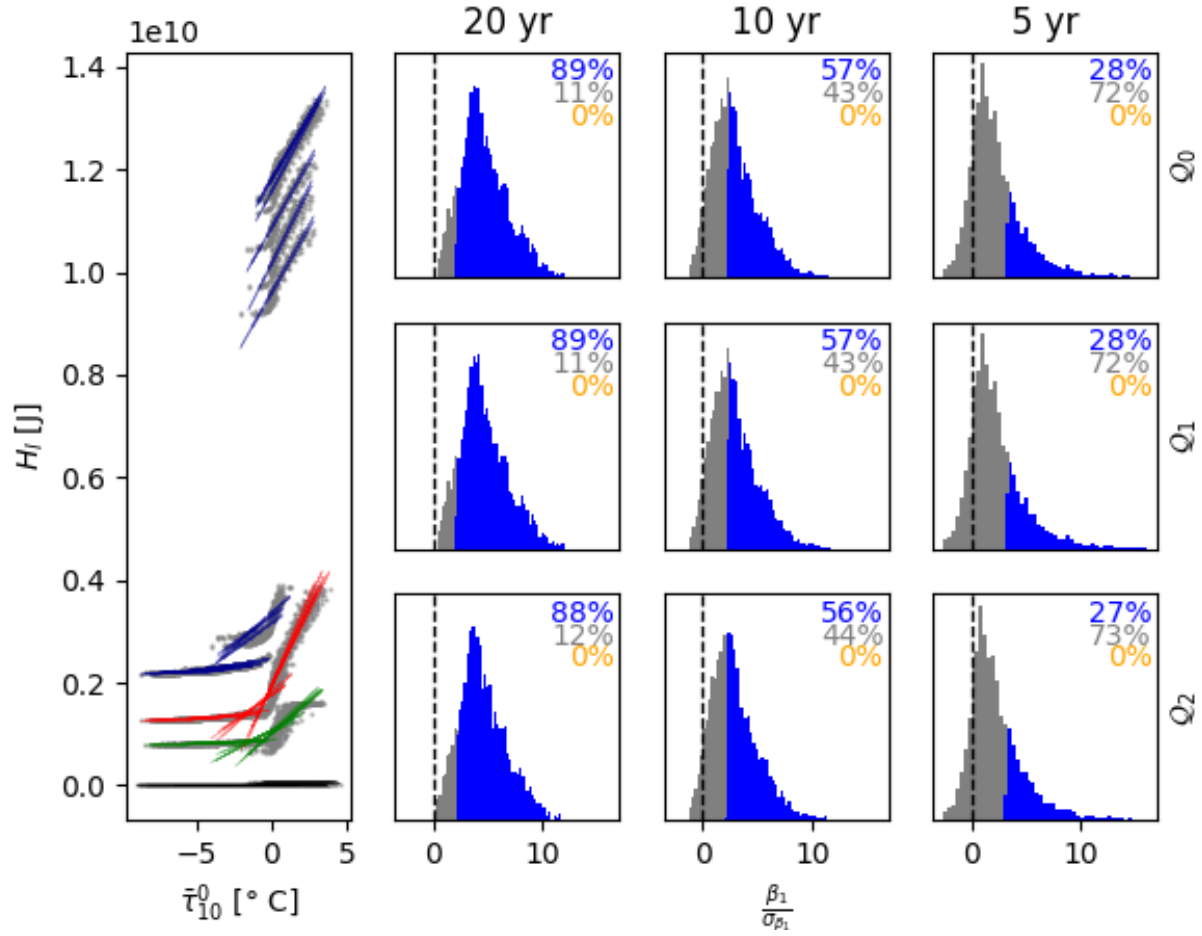

Figure S1: Effect of sensor quality and data length on the significance of metric ( $\bar{\tau}_{10}^0$ ) - heat ( $H_I$ ) relationship. Larger t-values indicate a more reliable relationship between changes in metric and changes in heat content. More consistently positive or negative t-values demonstrate a less ambiguous interpretation from the metric.

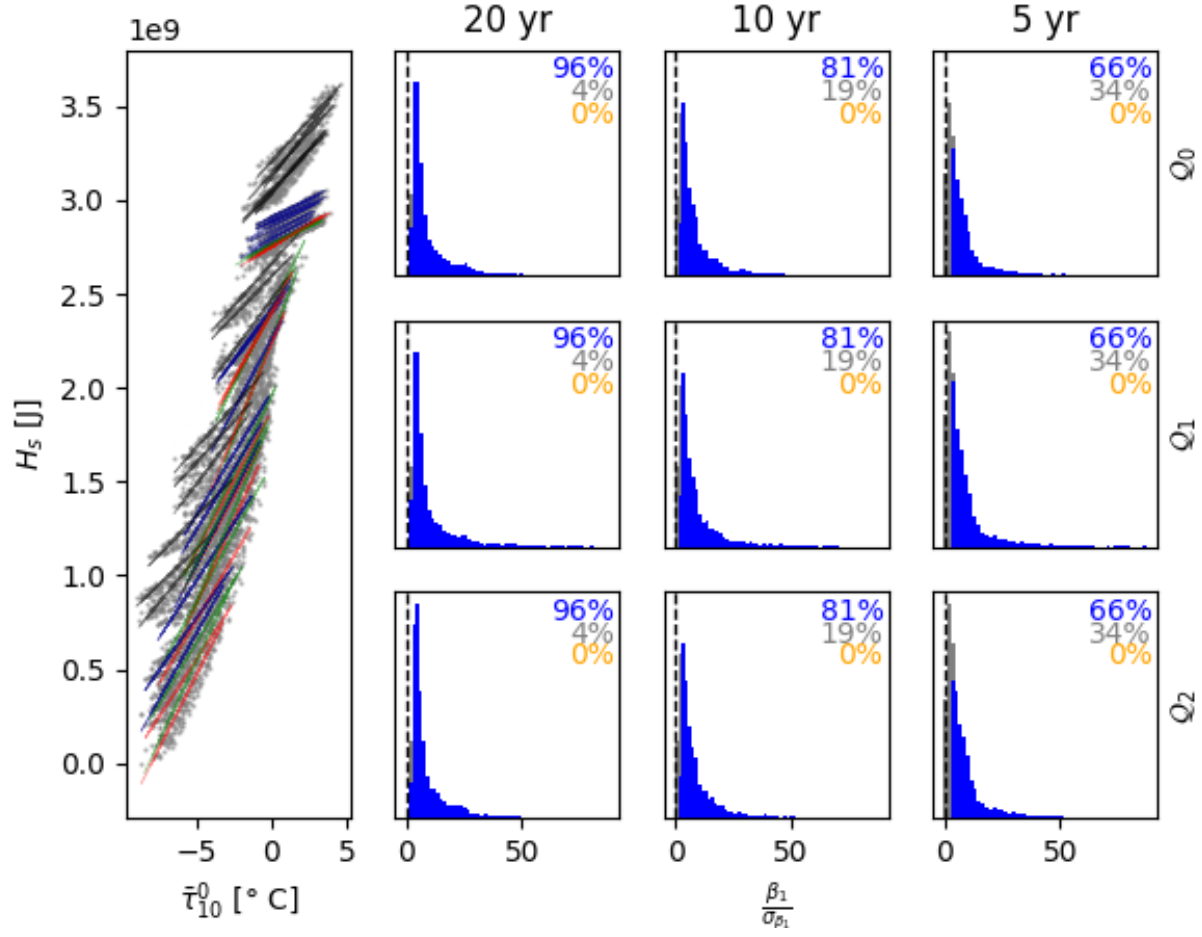

Figure S2: Effect of sensor quality and data length on the significance of metric ( $\bar{\tau}_{10}^0$ ) - heat ( $H_s$ ) relationship. Larger t-values indicate a more reliable relationship between changes in metric and changes in heat content. More consistently positive or negative t-values demonstrate a less ambiguous interpretation from the metric.

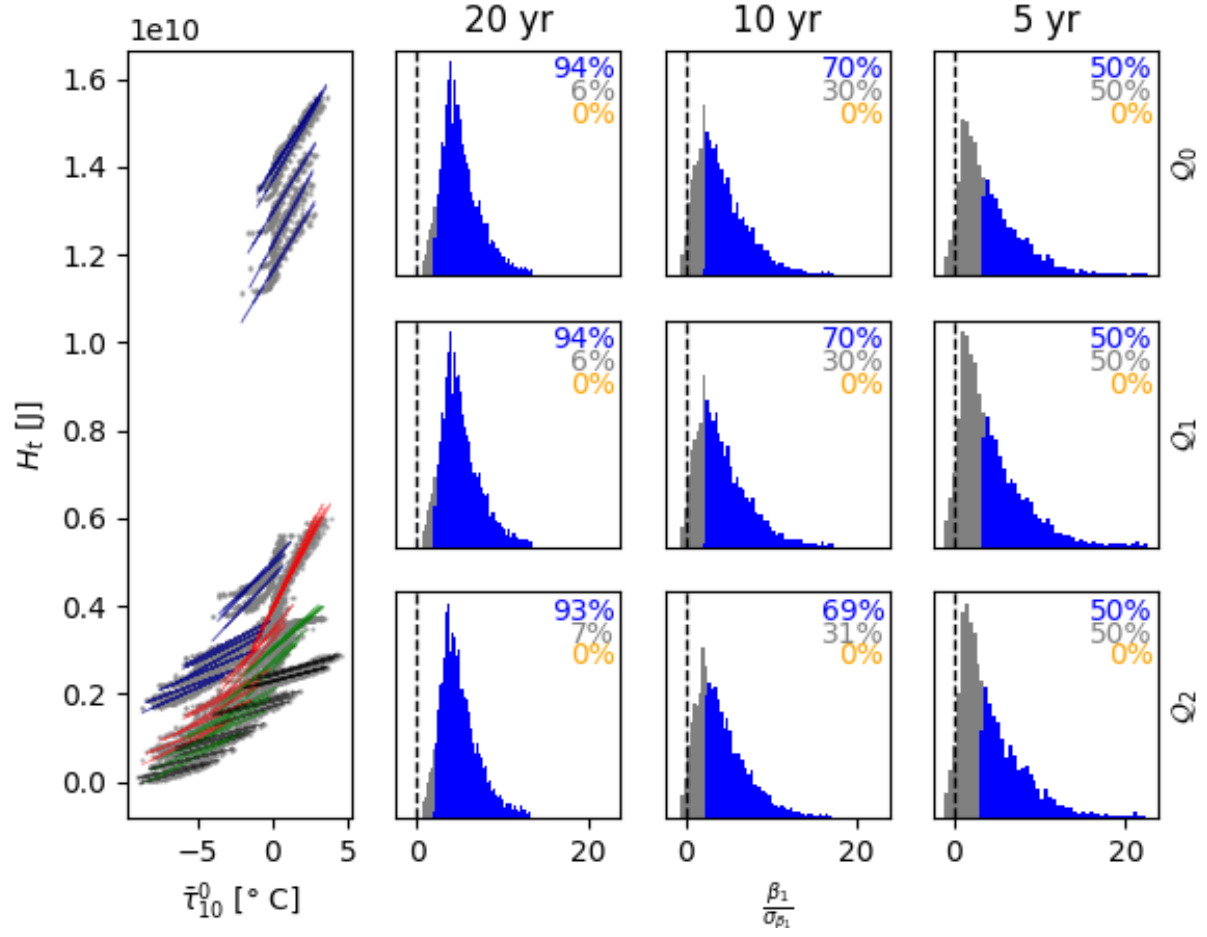

Figure S3: Effect of sensor quality and data length on the significance of metric ( $\bar{\tau}_{10}^0$ ) - heat ( $H_t$ ) relationship. Larger t-values indicate a more reliable relationship between changes in metric and changes in heat content. More consistently positive or negative t-values demonstrate a less ambiguous interpretation from the metric.

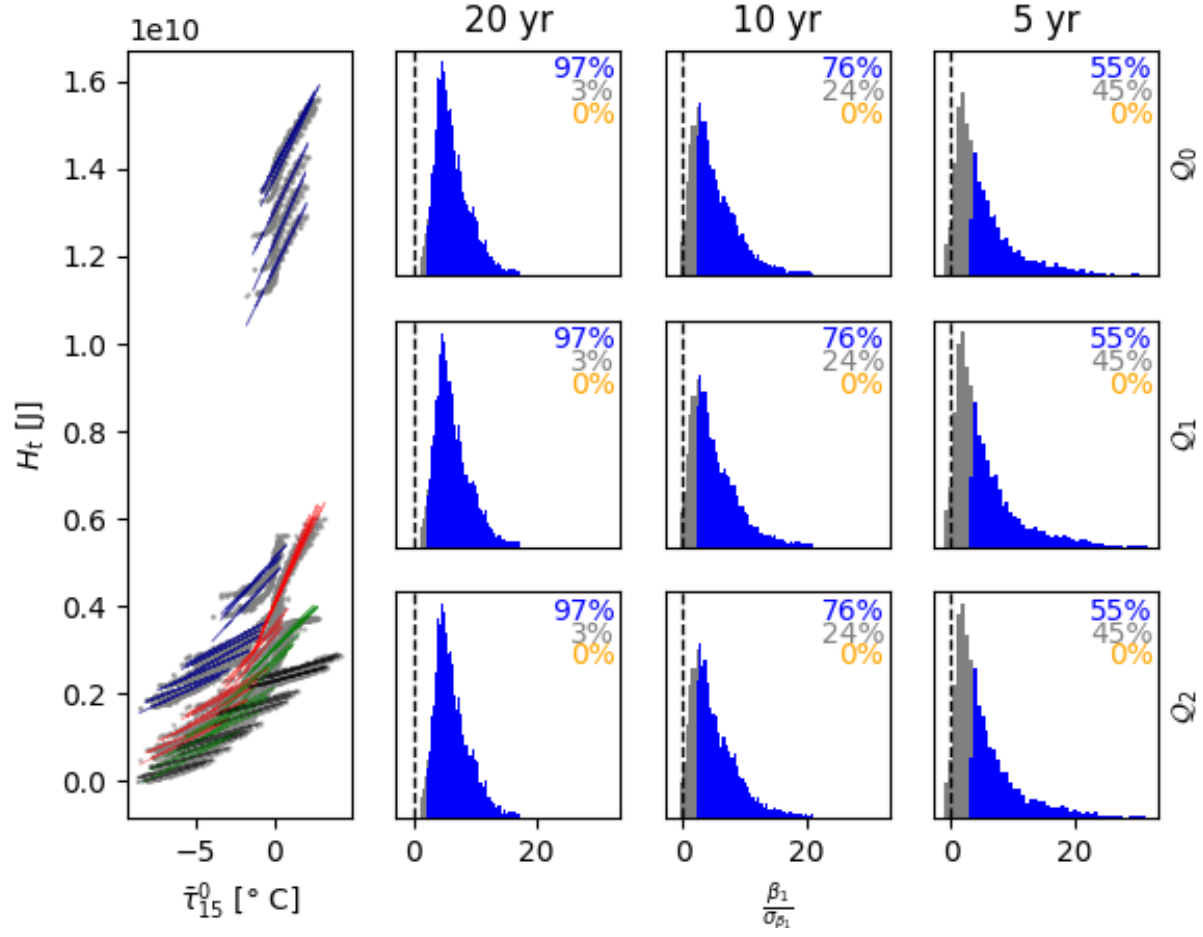

Figure S4: Effect of sensor quality and data length on the significance of metric ( $\bar{\tau}_{15}^0$ ) - heat ( $H_t$ ) relationship. Larger t-values indicate a more reliable relationship between changes in metric and changes in heat content. More consistently positive or negative t-values demonstrate a less ambiguous interpretation from the metric.

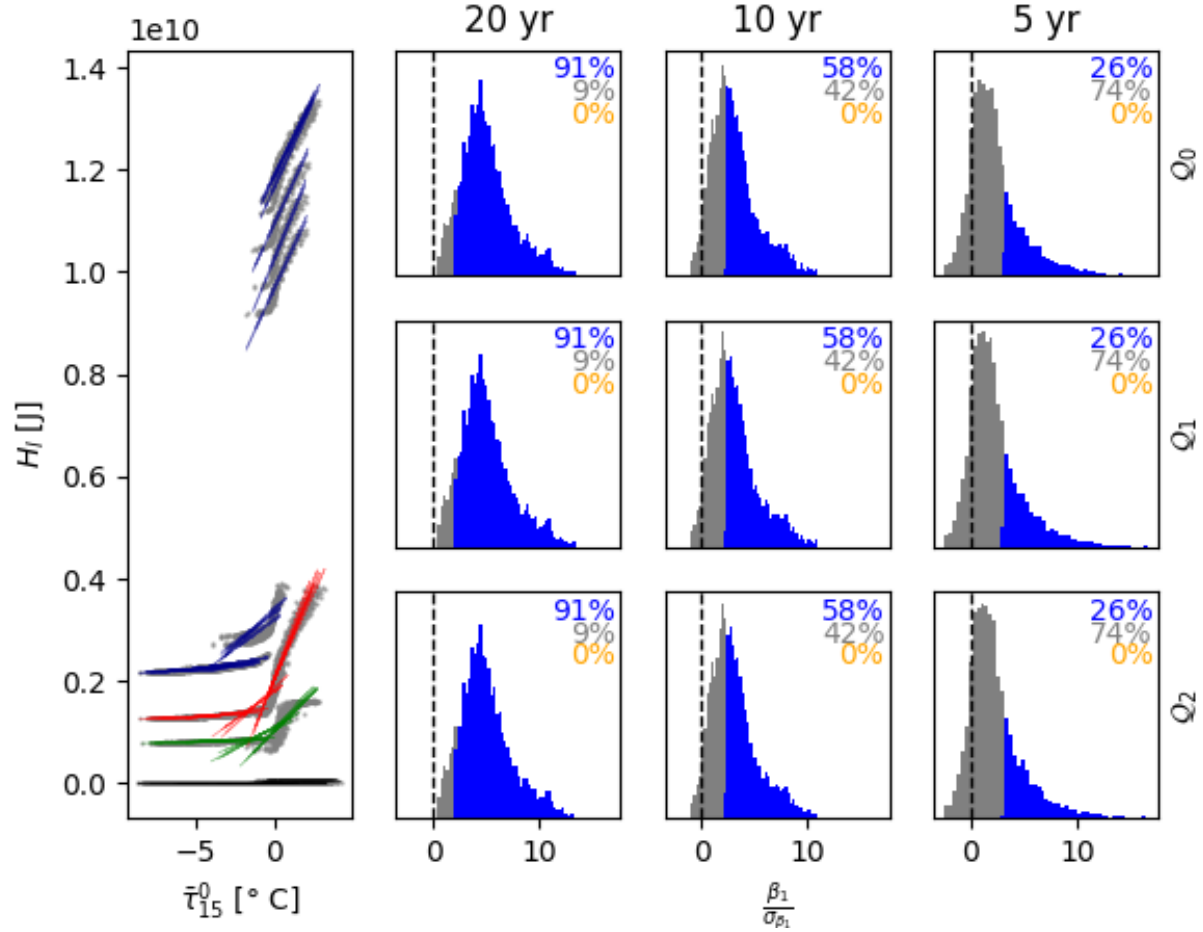

Figure S5: Effect of sensor quality and data length on the significance of metric ( $\bar{\tau}_{15}^0$ ) - heat ( $H_i$ ) relationship. Larger t-values indicate a more reliable relationship between changes in metric and changes in heat content. More consistently positive or negative t-values demonstrate a less ambiguous interpretation from the metric.

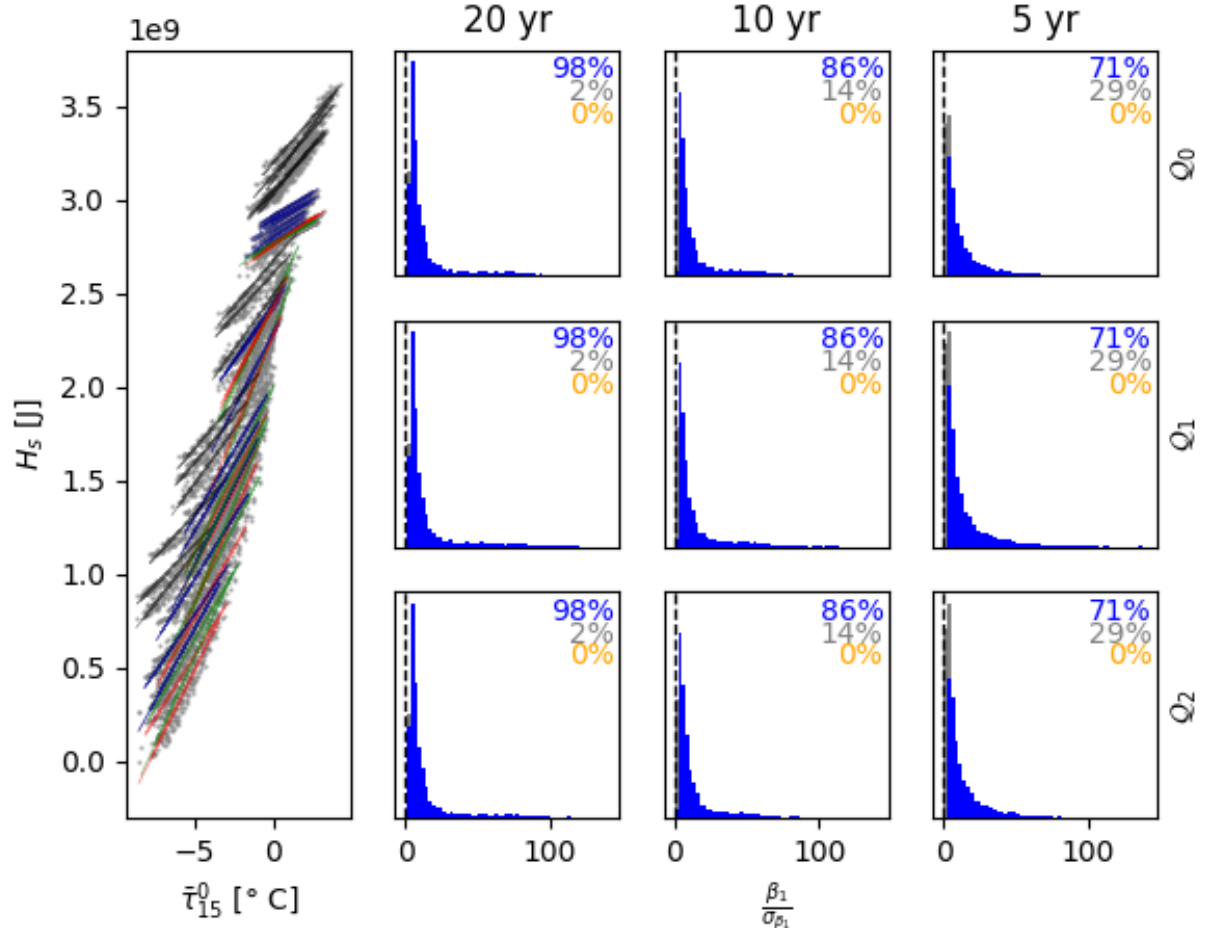

Figure S6: Effect of sensor quality and data length on the significance of metric ( $\bar{\tau}_{15}^0$ ) - heat ( $H_s$ ) relationship. Larger t-values indicate a more reliable relationship between changes in metric and changes in heat content. More consistently positive or negative t-values demonstrate a less ambiguous interpretation from the metric.

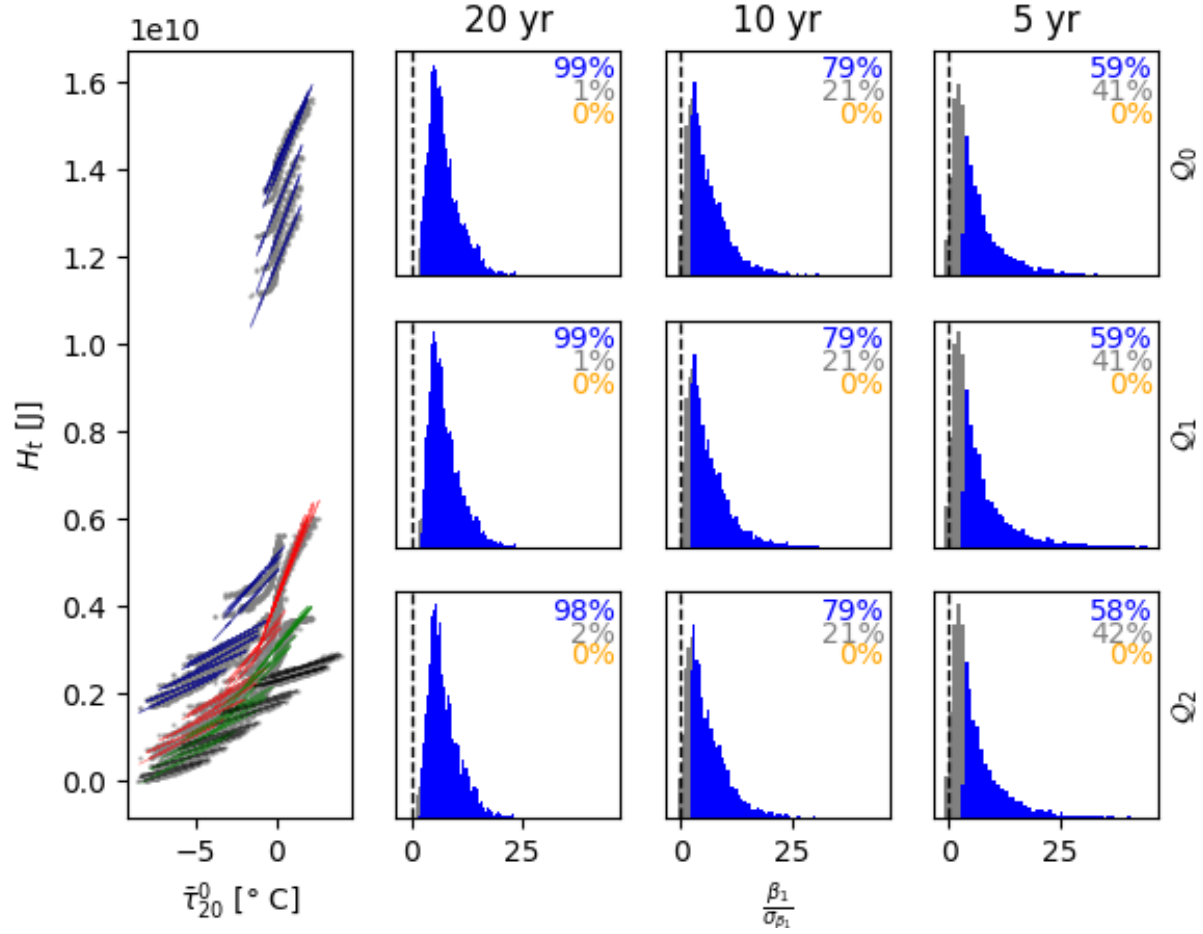

Figure S7: Effect of sensor quality and data length on the significance of metric  $(\bar{\tau}_{20}^0)$  - heat ( $H_t$ ) relationship. Larger t-values indicate a more reliable relationship between changes in metric and changes in heat content. More consistently positive or negative t-values demonstrate a less ambiguous interpretation from the metric.

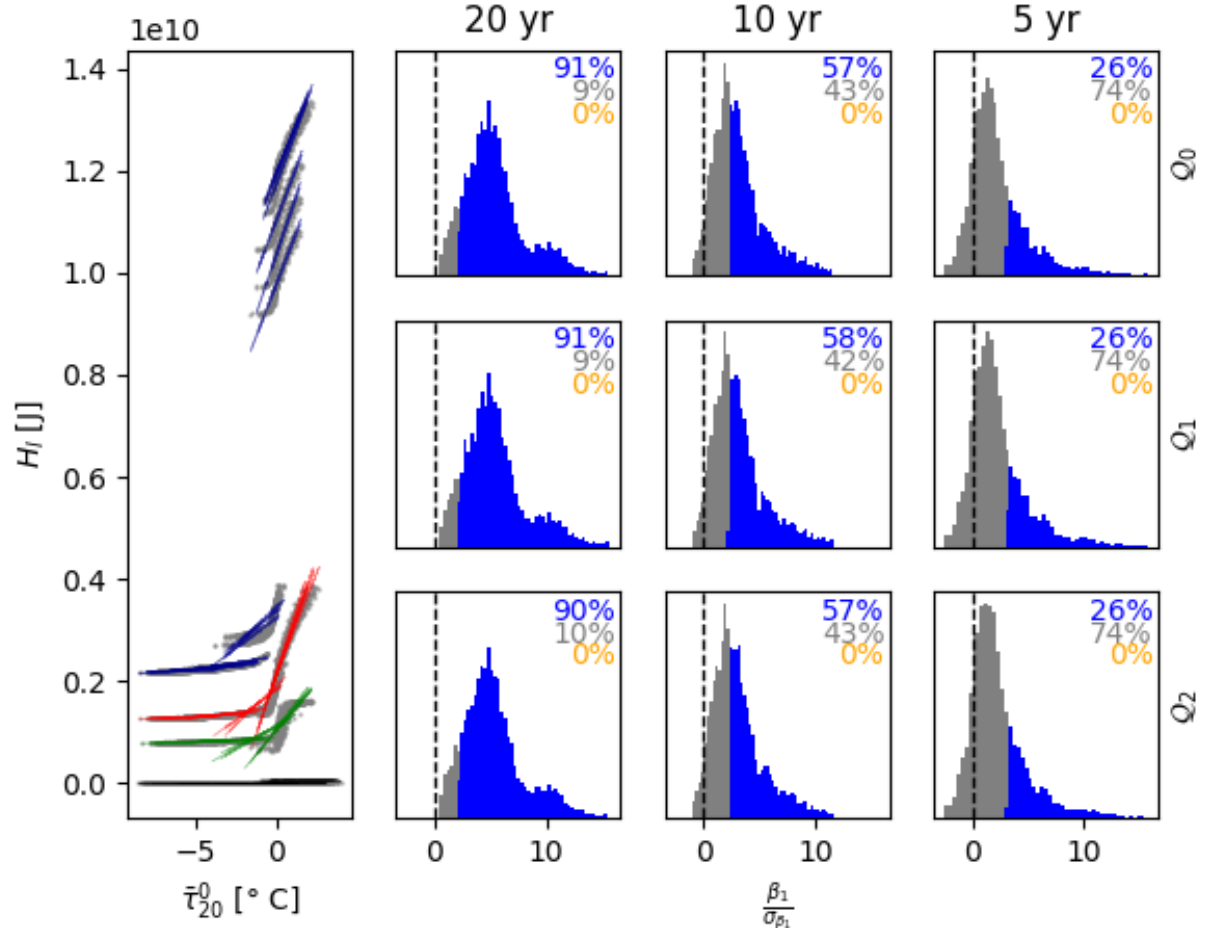

Figure S8: Effect of sensor quality and data length on the significance of metric ( $\bar{\tau}_{20}^0$ ) - heat ( $H_I$ ) relationship. Larger t-values indicate a more reliable relationship between changes in metric and changes in heat content. More consistently positive or negative t-values demonstrate a less ambiguous interpretation from the metric.



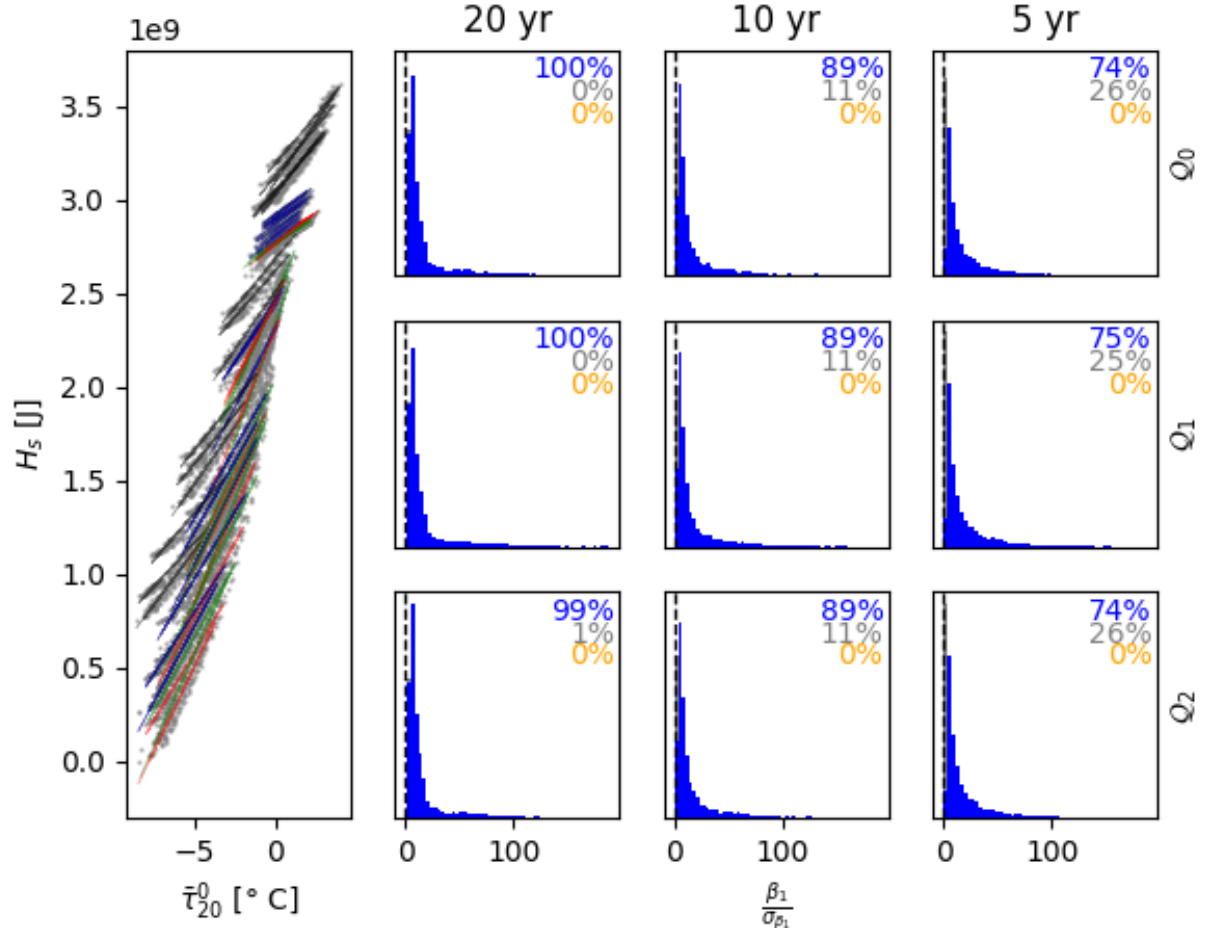

Figure S9: Effect of sensor quality and data length on the significance of metric ( $\bar{\tau}_{20}^0$ ) - heat ( $H_s$ ) relationship. Larger t-values indicate a more reliable relationship between changes in metric and changes in heat content. More consistently positive or negative t-values demonstrate a less ambiguous interpretation from the metric.

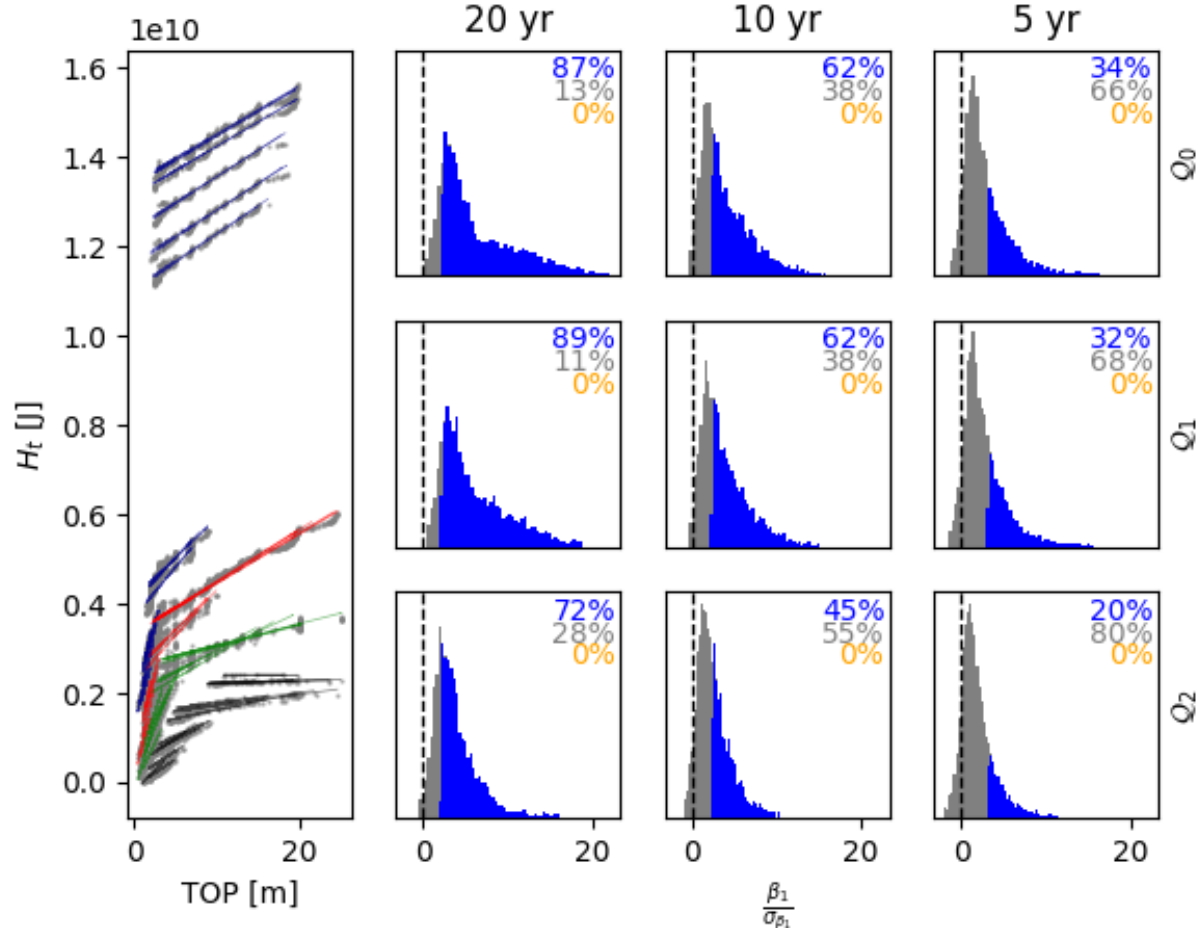

Figure S10: Effect of sensor quality and data length on the significance of metric (TOP) - heat ( $H_t$ ) relationship. Larger t-values indicate a more reliable relationship between changes in metric and changes in heat content. More consistently positive or negative t-values demonstrate a less ambiguous interpretation from the metric.

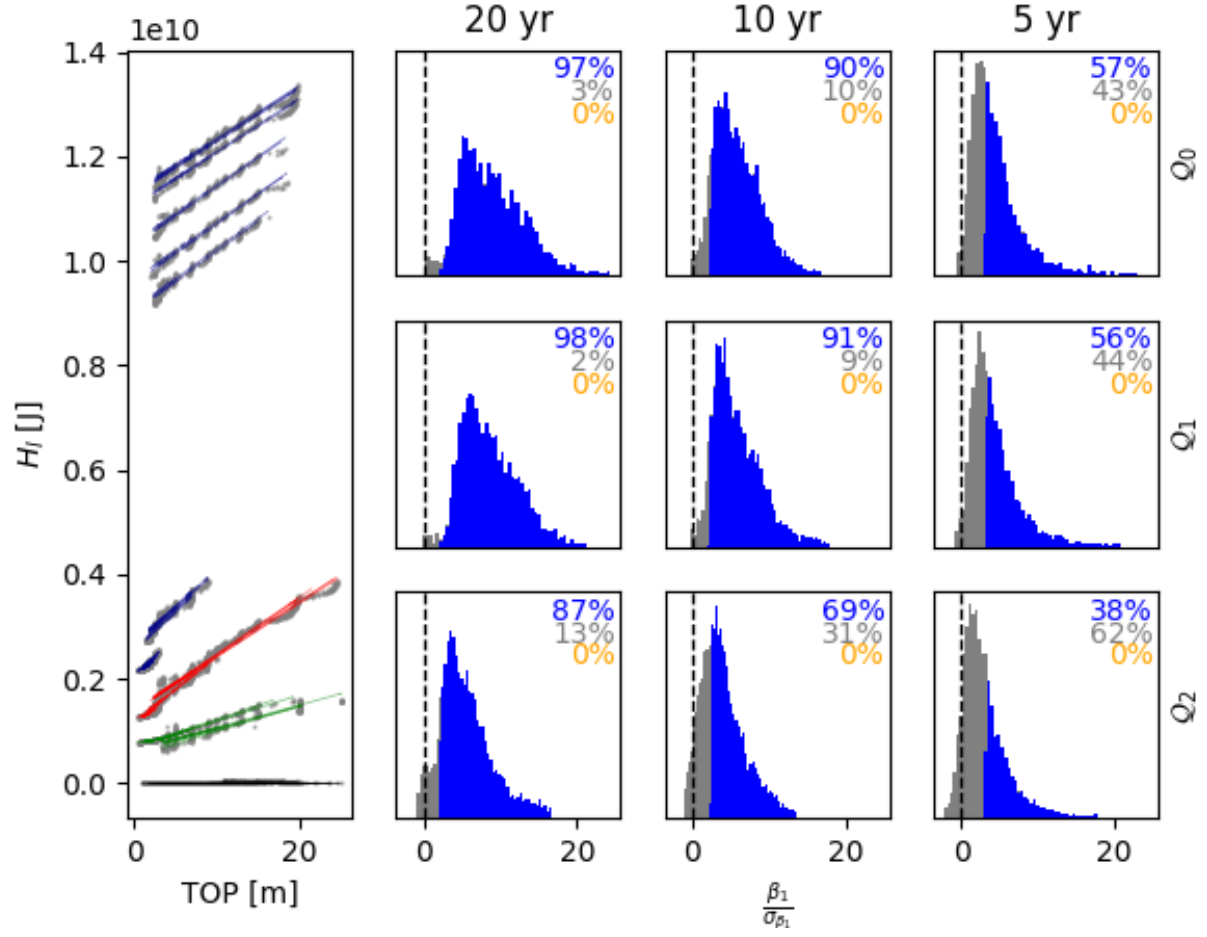

Figure S11: Effect of sensor quality and data length on the significance of metric (TOP) - heat ( $H_l$ ) relationship. Larger t-values indicate a more reliable relationship between changes in metric and changes in heat content. More consistently positive or negative t-values demonstrate a less ambiguous interpretation from the metric.

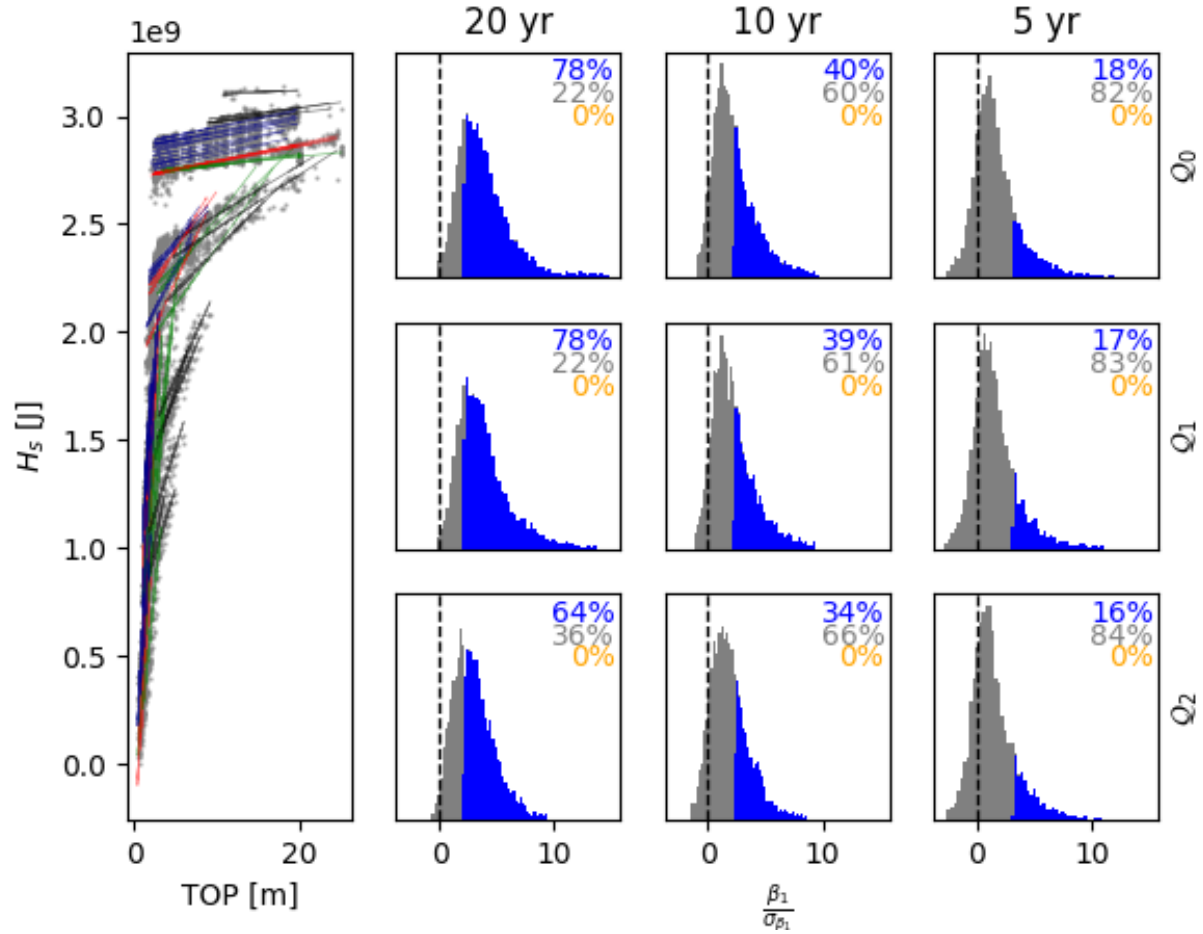

Figure S12: Effect of sensor quality and data length on the significance of metric (TOP) - heat ( $H_s$ ) relationship. Larger t-values indicate a more reliable relationship between changes in metric and changes in heat content. More consistently positive or negative t-values demonstrate a less ambiguous interpretation from the metric.

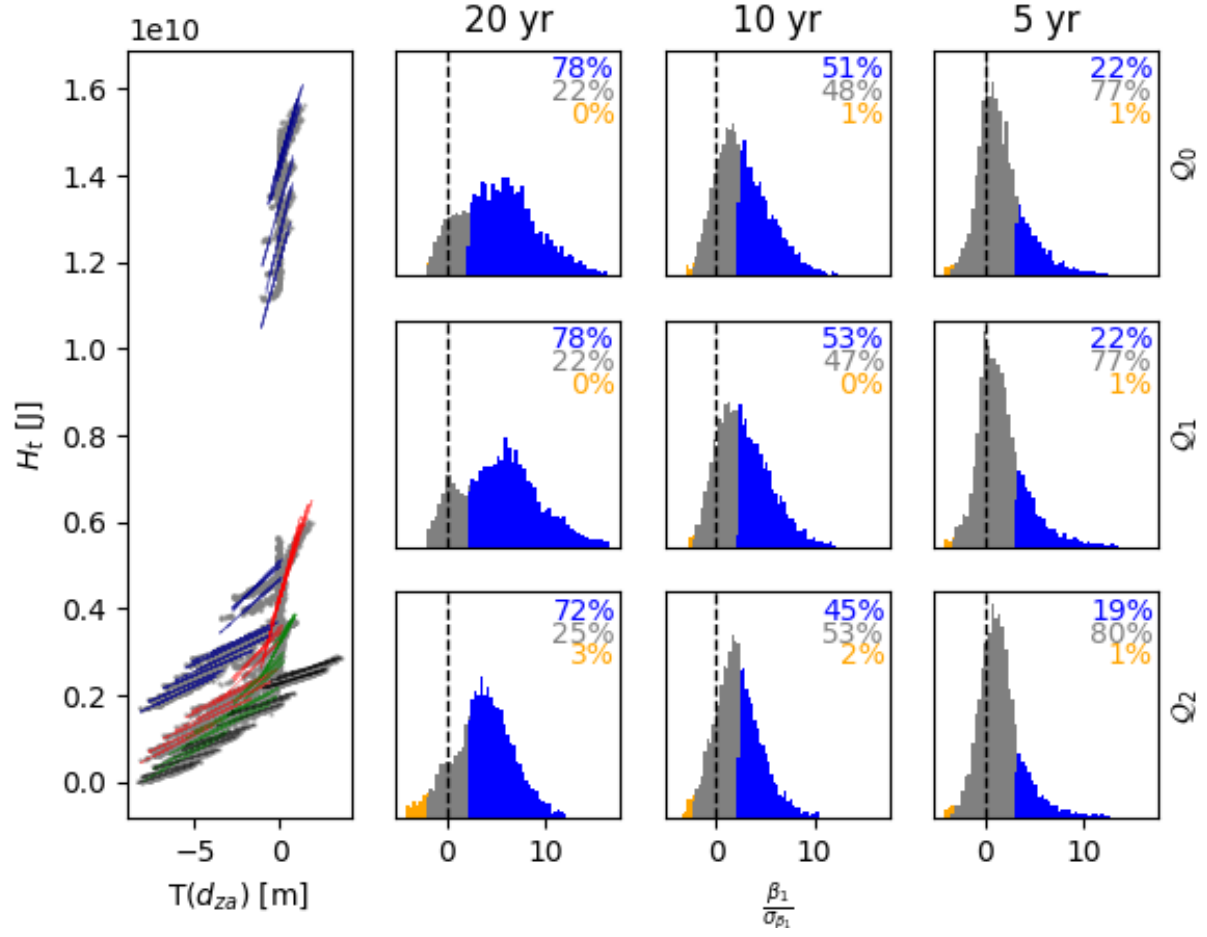

Figure S13: Effect of sensor quality and data length on the significance of metric ( $T_{za}$ ) - heat ( $H_t$ ) relationship. Larger t-values indicate a more reliable relationship between changes in metric and changes in heat content. More consistently positive or negative t-values demonstrate a less ambiguous interpretation from the metric.

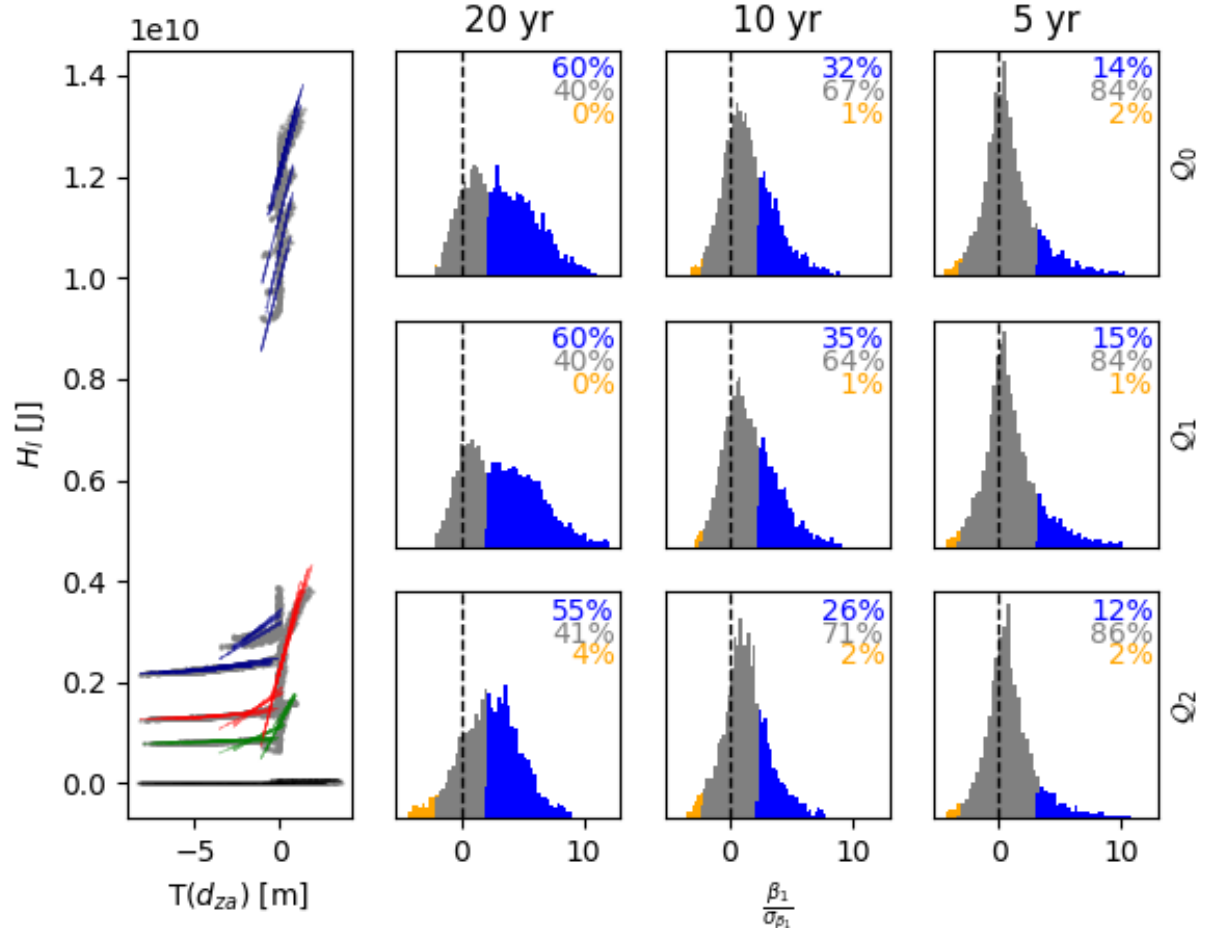

Figure S14: Effect of sensor quality and data length on the significance of metric ( $T_{za}$ ) - heat ( $H_I$ ) relationship. Larger t-values indicate a more reliable relationship between changes in metric and changes in heat content. More consistently positive or negative t-values demonstrate a less ambiguous interpretation from the metric.

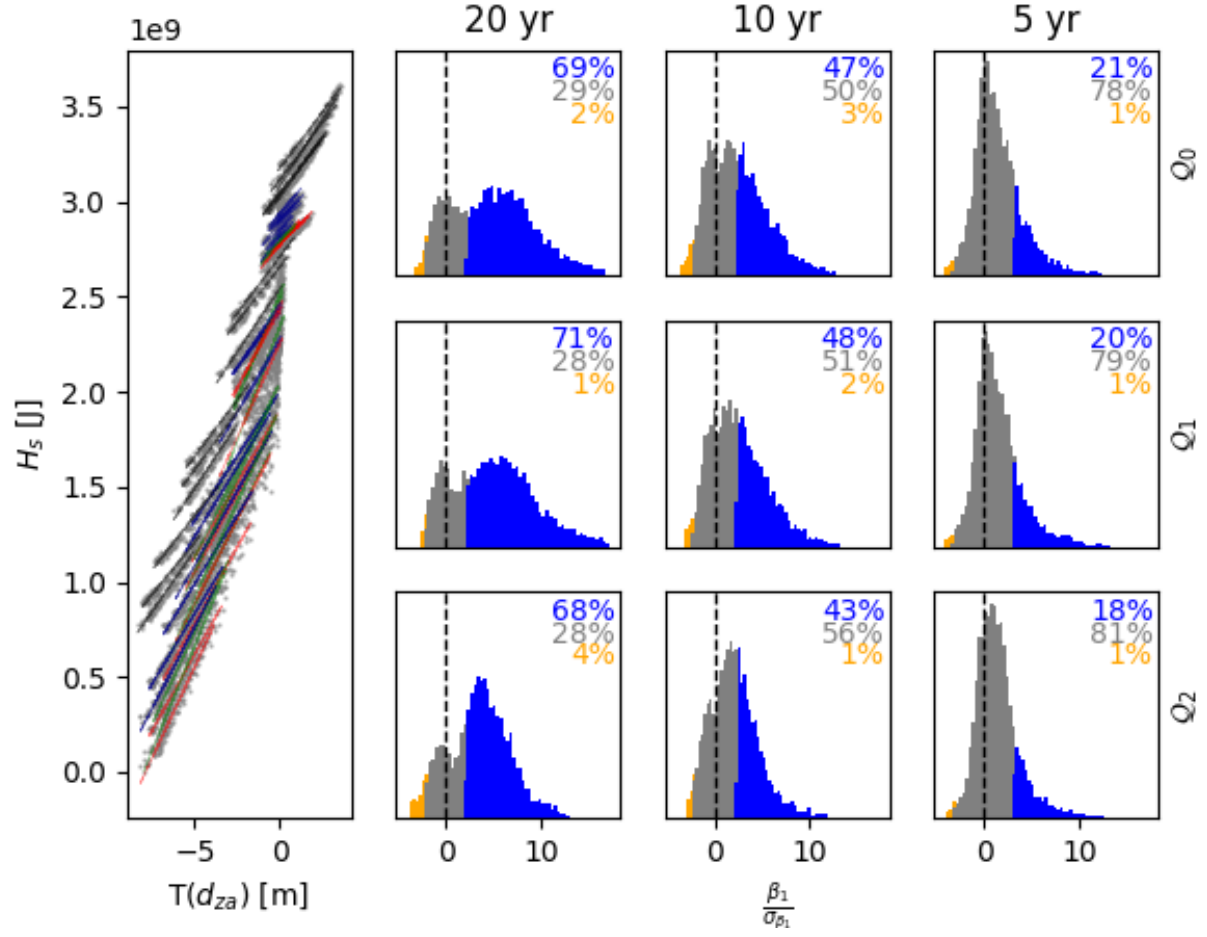

Figure S15: Effect of sensor quality and data length on the significance of metric ( $T_{za}$ ) - heat ( $H_s$ ) relationship. Larger t-values indicate a more reliable relationship between changes in metric and changes in heat content. More consistently positive or negative t-values demonstrate a less ambiguous interpretation from the metric.

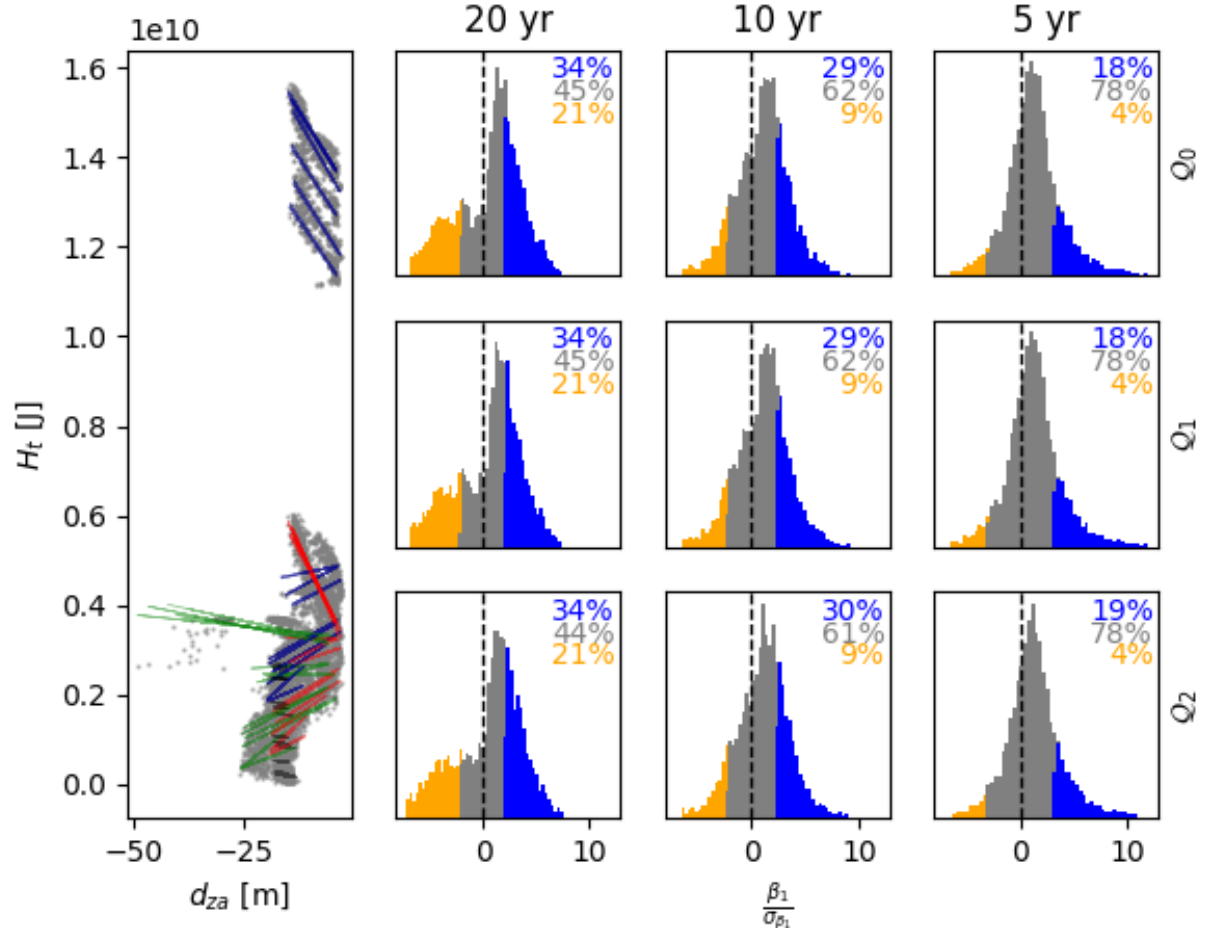

Figure S16: Effect of sensor quality and data length on the significance of metric ( $d_{za}$ ) - heat ( $H_t$ ) relationship. Larger t-values indicate a more reliable relationship between changes in metric and changes in heat content. More consistently positive or negative t-values demonstrate a less ambiguous interpretation from the metric.



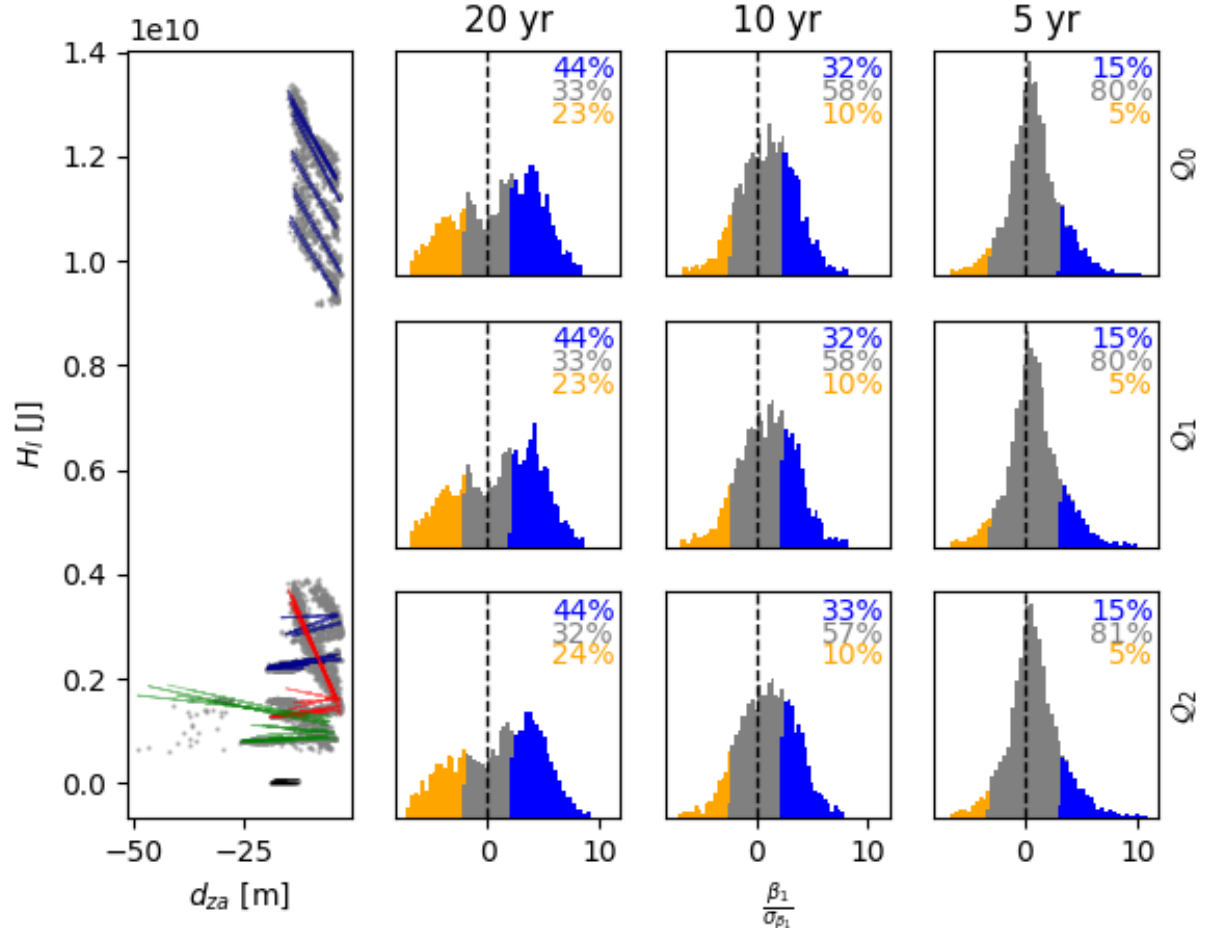

Figure S17: Effect of sensor quality and data length on the significance of metric ( $d_{za}$ ) - heat ( $H_l$ ) relationship. Larger t-values indicate a more reliable relationship between changes in metric and changes in heat content. More consistently positive or negative t-values demonstrate a less ambiguous interpretation from the metric.

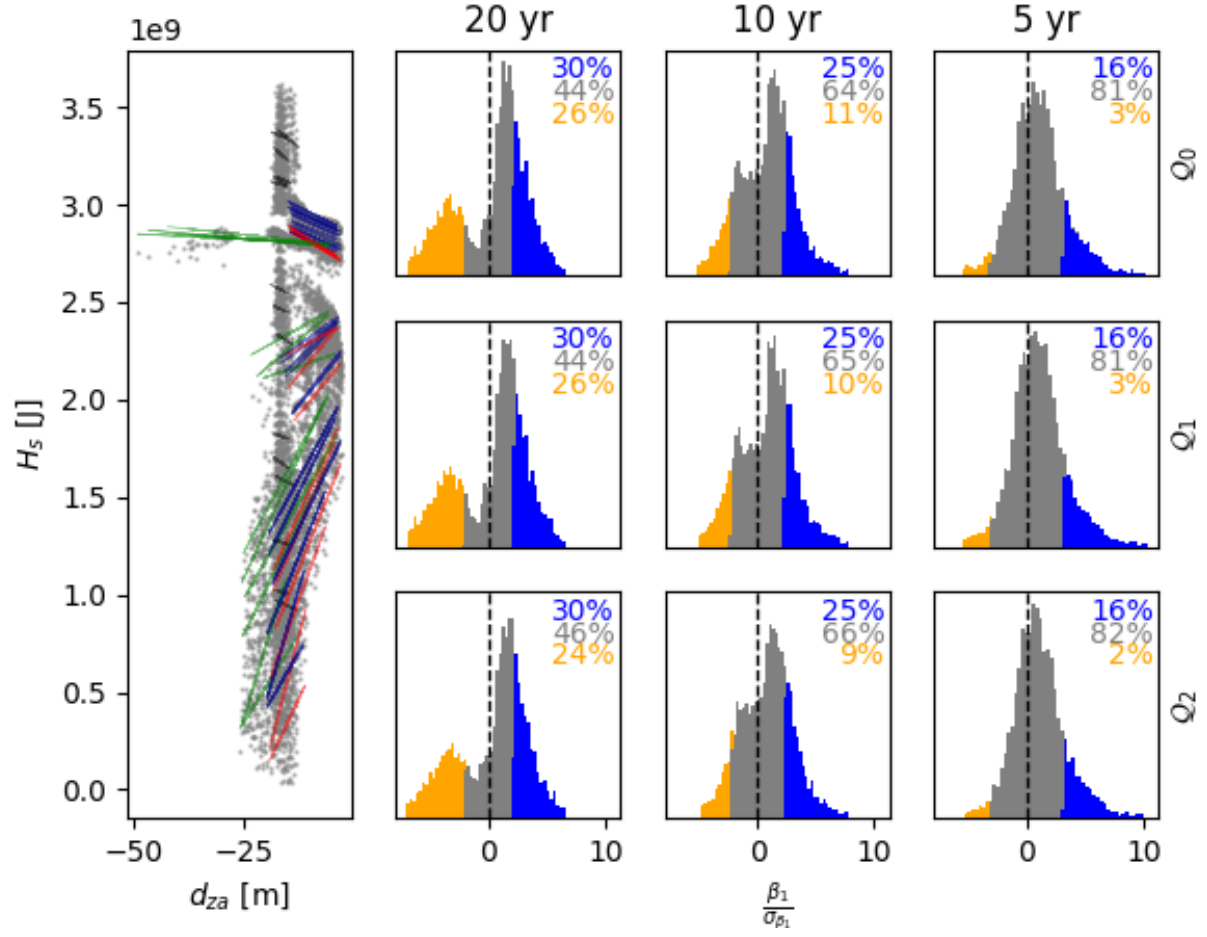

Figure S18: Effect of sensor quality and data length on the significance of metric ( $d_{zs}$ ) - heat ( $H_s$ ) relationship. Larger t-values indicate a more reliable relationship between changes in metric and changes in heat content. More consistently positive or negative t-values demonstrate a less ambiguous interpretation from the metric.

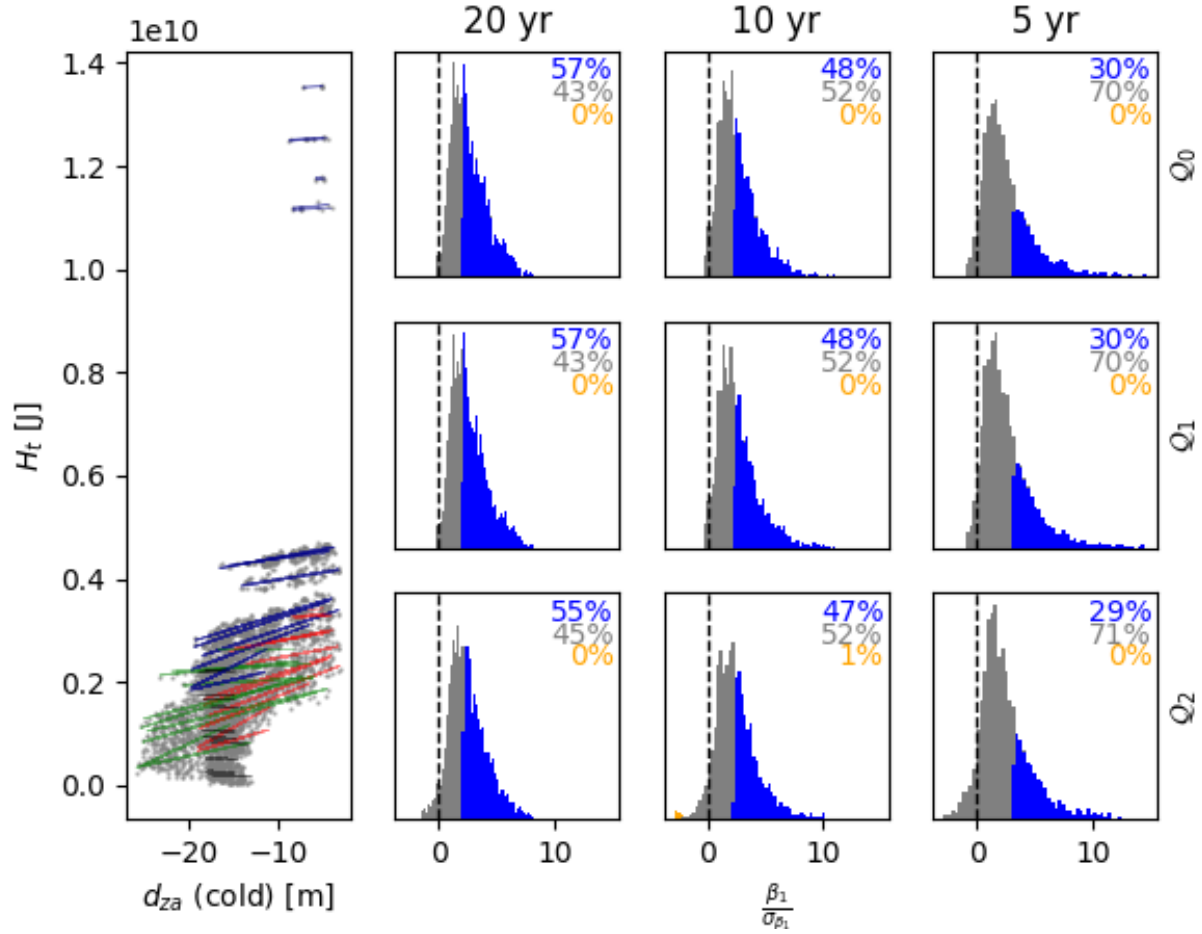

Figure S19: Effect of sensor quality and data length on the significance of metric ( $d_{za}$ ) - heat ( $H_t$ ) relationship for cold conditions. Larger t-values indicate a more reliable relationship between changes in metric and changes in heat content. More consistently positive or negative t-values demonstrate a less ambiguous interpretation from the metric.

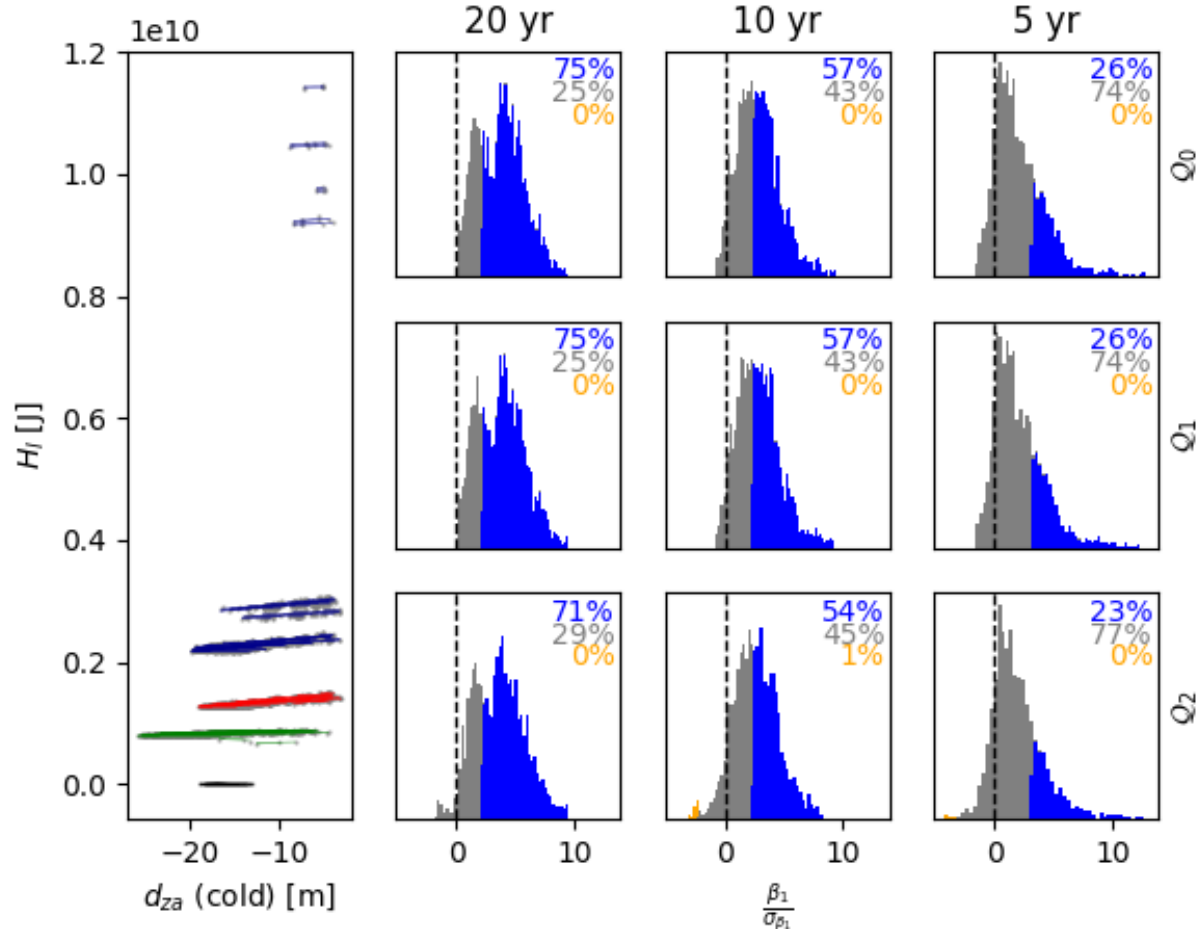

Figure S20: Effect of sensor quality and data length on the significance of metric ( $d_{za}$ ) - heat ( $H_l$ ) relationship for cold conditions. Larger t-values indicate a more reliable relationship between changes in metric and changes in heat content. More consistently positive or negative t-values demonstrate a less ambiguous interpretation from the metric.

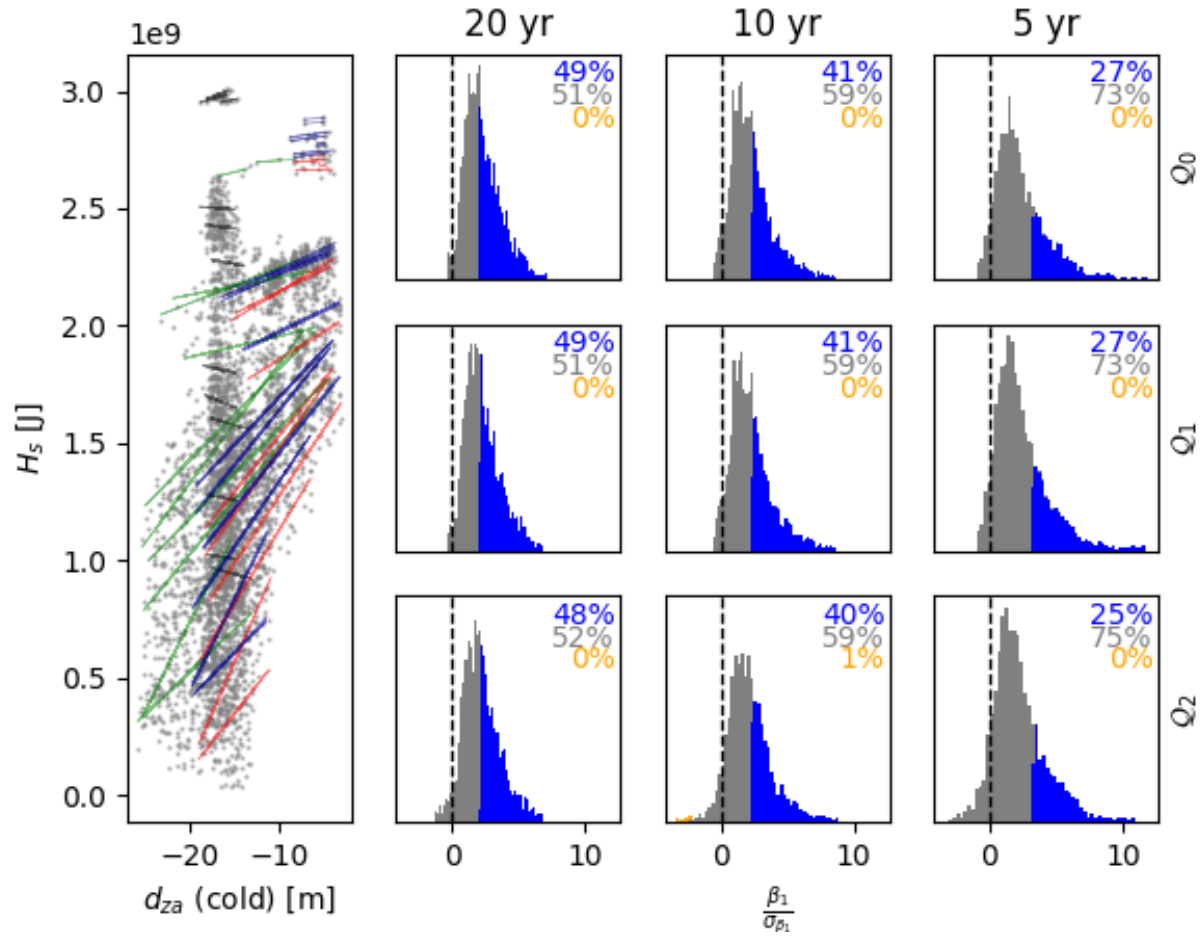

Figure S21: Effect of sensor quality and data length on the significance of metric ( $d_{za}$ ) - heat ( $H_s$ ) relationship for cold conditions. Larger t-values indicate a more reliable relationship between changes in metric and changes in heat content. More consistently positive or negative t-values demonstrate a less ambiguous interpretation from the metric.

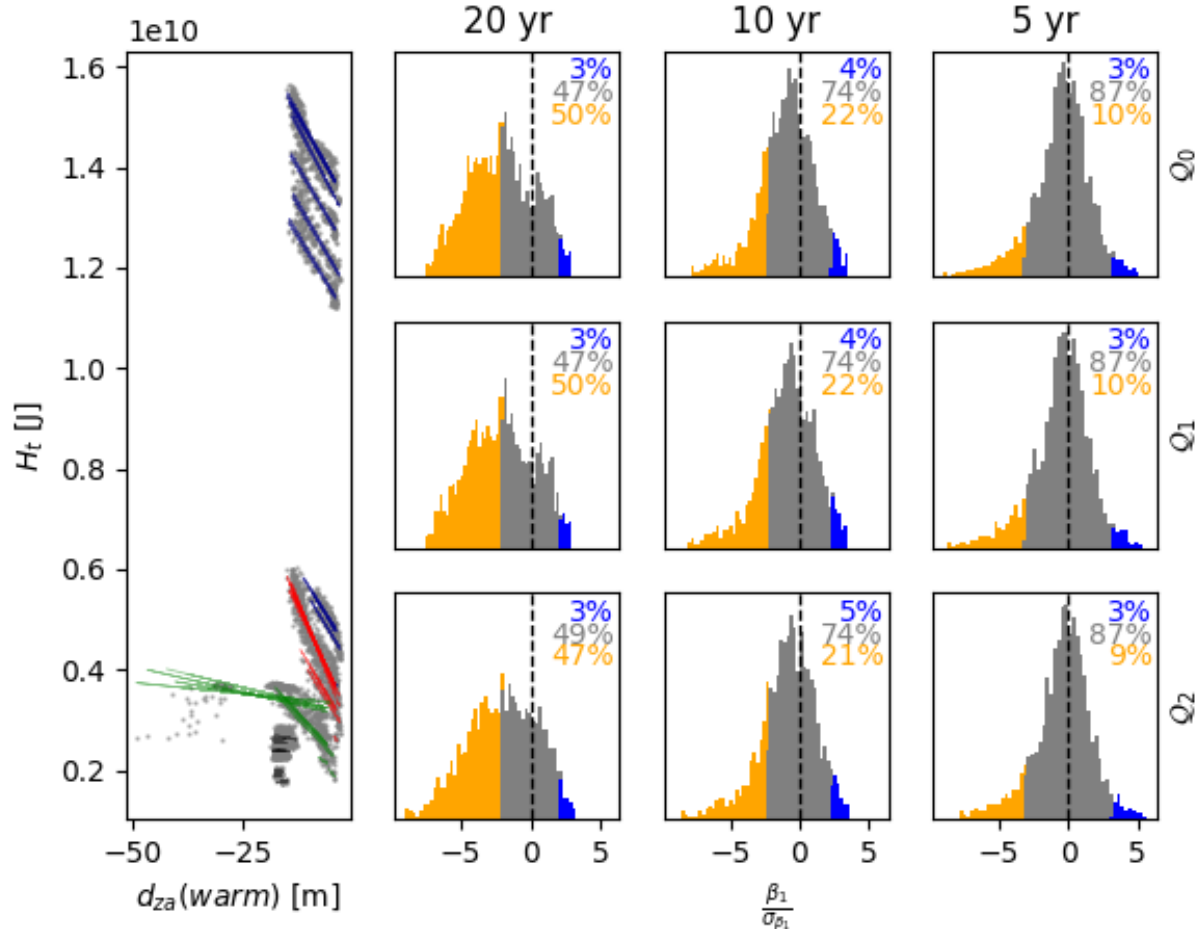

Figure S22: Effect of sensor quality and data length on the significance of metric ( $d_{za}$ ) - heat ( $H_t$ ) relationship for warm conditions. Larger t-values indicate a more reliable relationship between changes in metric and changes in heat content. More consistently positive or negative t-values demonstrate a less ambiguous interpretation from the metric.

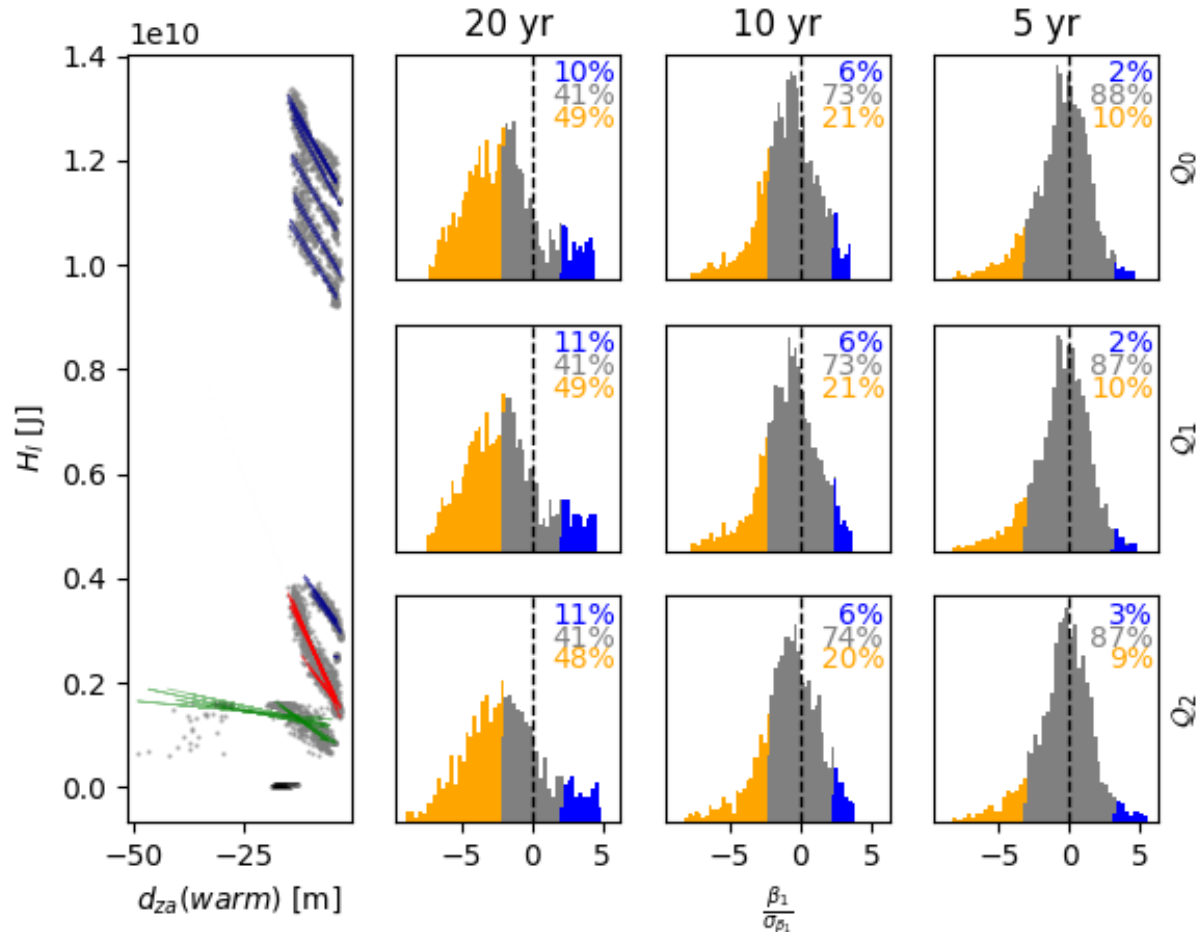

Figure S23: Effect of sensor quality and data length on the significance of metric ( $d_{za}$ ) - heat ( $H_l$ ) relationship for warm conditions. Larger t-values indicate a more reliable relationship between changes in metric and changes in heat content. More consistently positive or negative t-values demonstrate a less ambiguous interpretation from the metric.

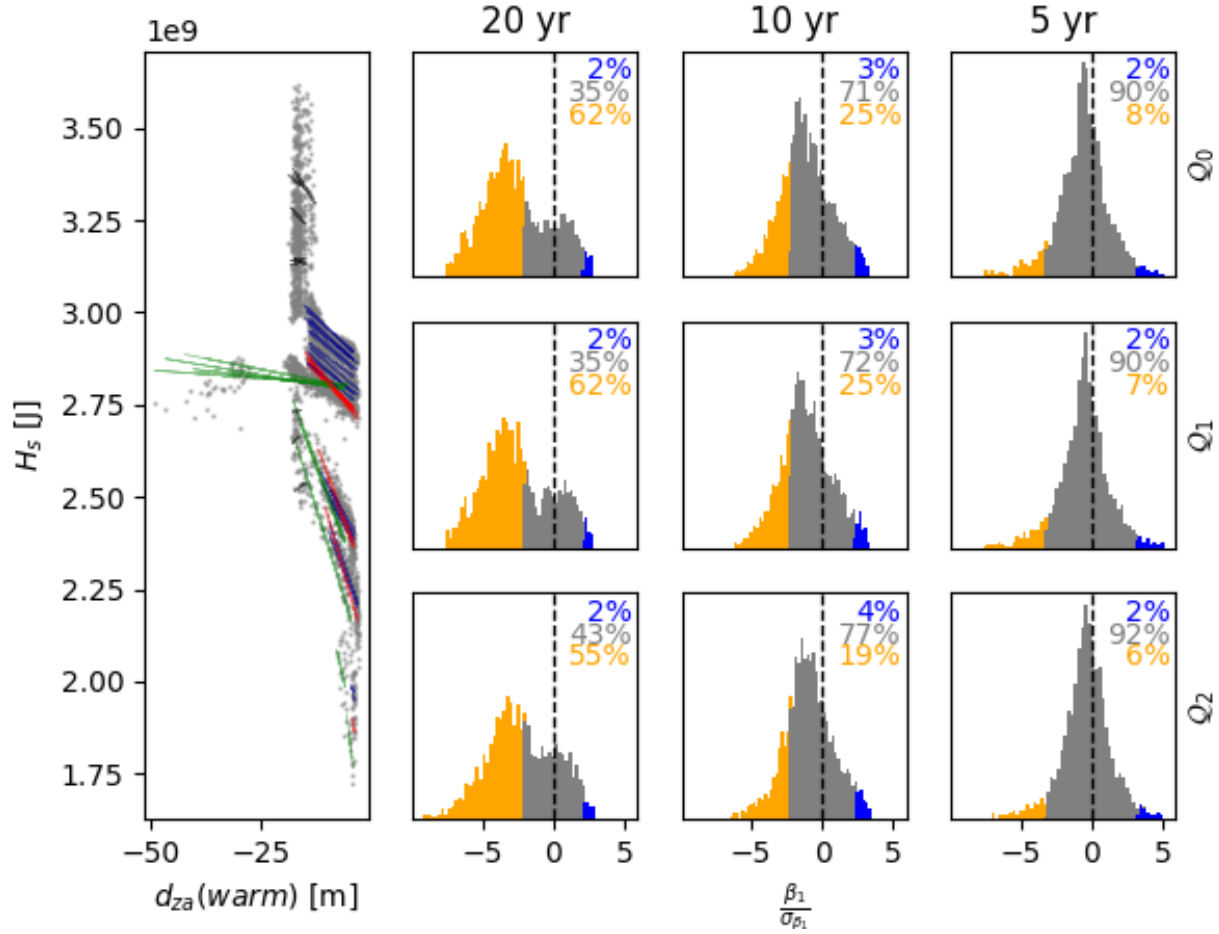

Figure S24: Effect of sensor quality and data length on the significance of metric ( $d_{za}$ ) - heat ( $H_s$ ) relationship for warm conditions. Larger t-values indicate a more reliable relationship between changes in metric and changes in heat content. More consistently positive or negative t-values demonstrate a less ambiguous interpretation from the metric.



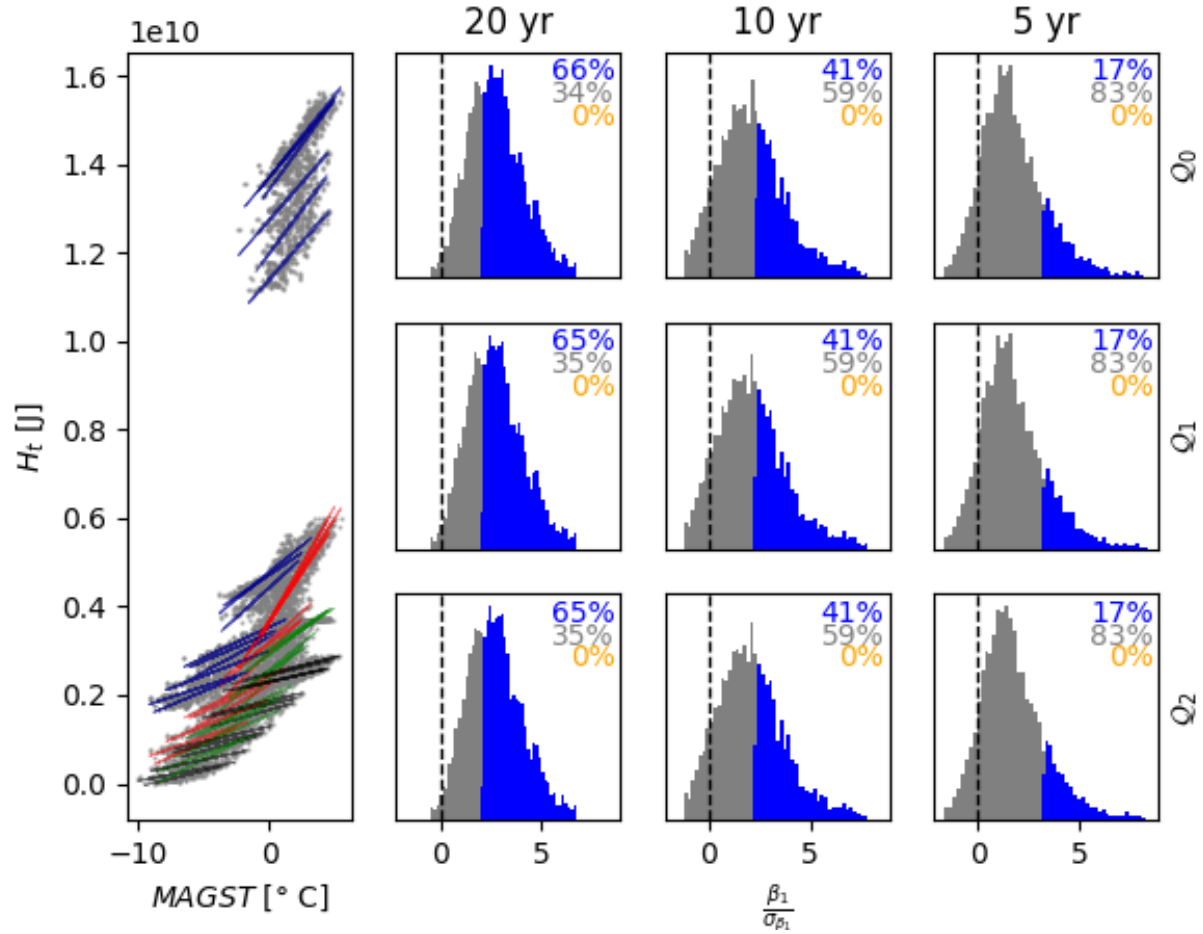

Figure S25: Effect of sensor quality and data length on the significance of metric (MAGST) - heat ( $H_t$ ) relationship. Larger t-values indicate a more reliable relationship between changes in metric and changes in heat content. More consistently positive or negative t-values demonstrate a less ambiguous interpretation from the metric.

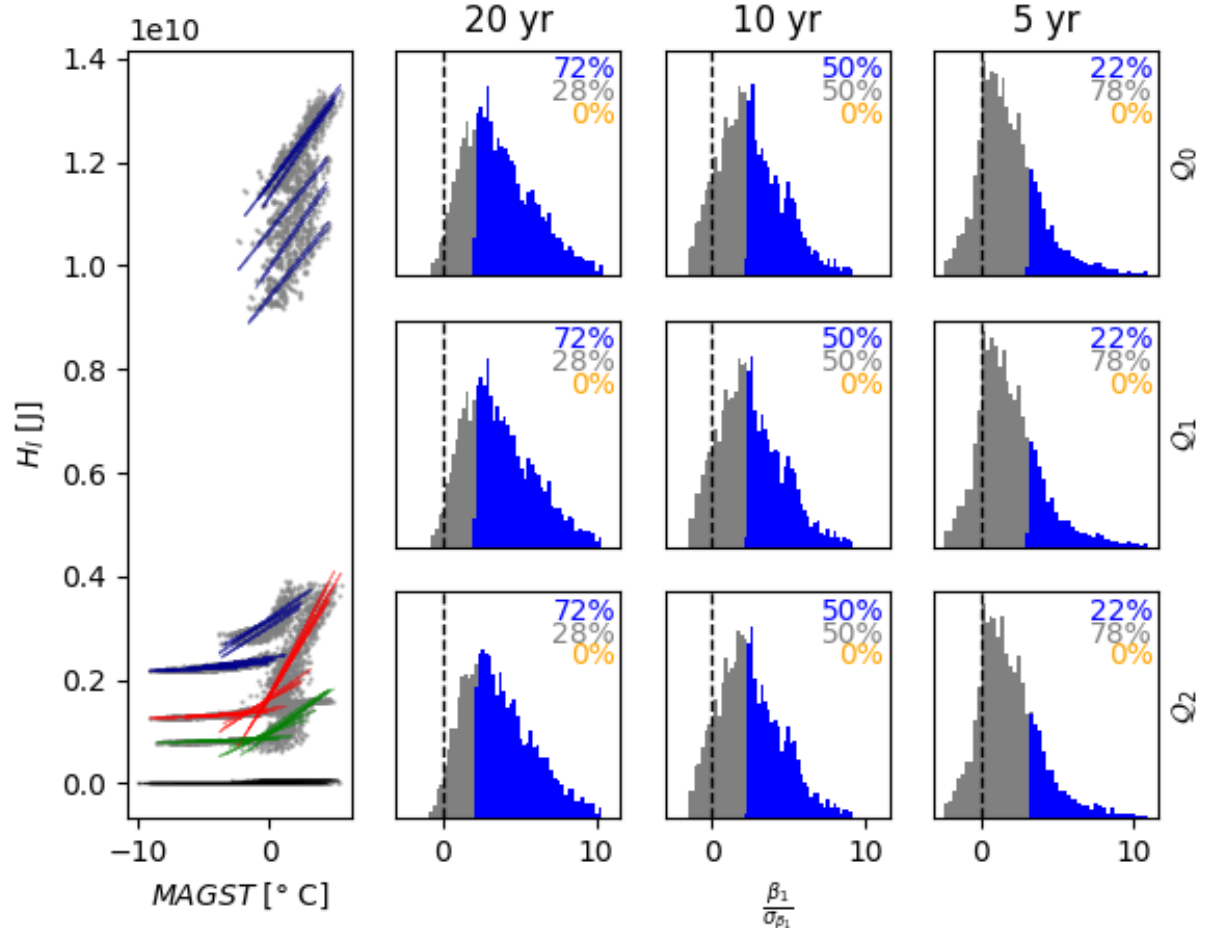

Figure S26: Effect of sensor quality and data length on the significance of metric (MAGST) - heat ( $H_I$ ) relationship. Larger t-values indicate a more reliable relationship between changes in metric and changes in heat content. More consistently positive or negative t-values demonstrate a less ambiguous interpretation from the metric.

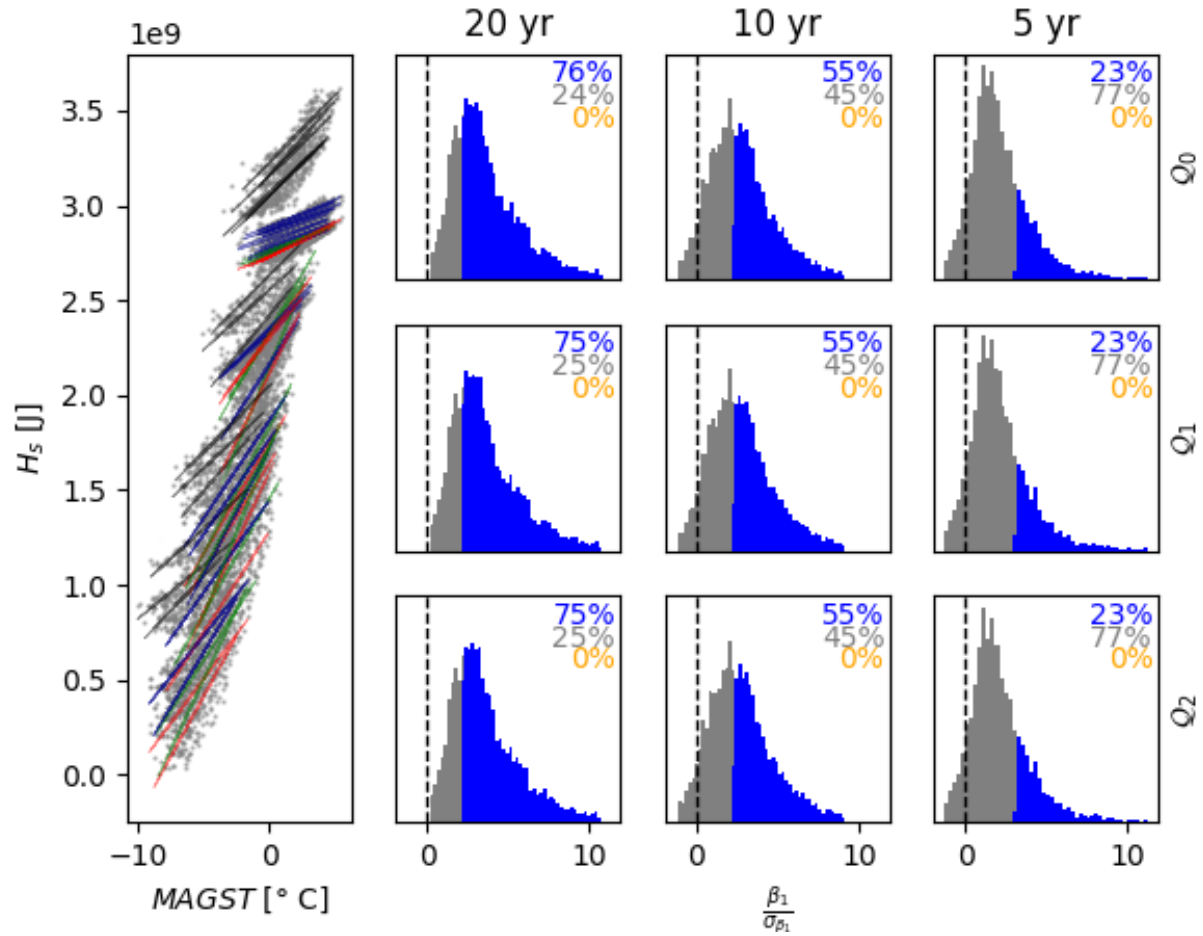

Figure S27: Effect of sensor quality and data length on the significance of metric (MAGST) - heat ( $H_s$ ) relationship. Larger t-values indicate a more reliable relationship between changes in metric and changes in heat content. More consistently positive or negative t-values demonstrate a less ambiguous interpretation from the metric.

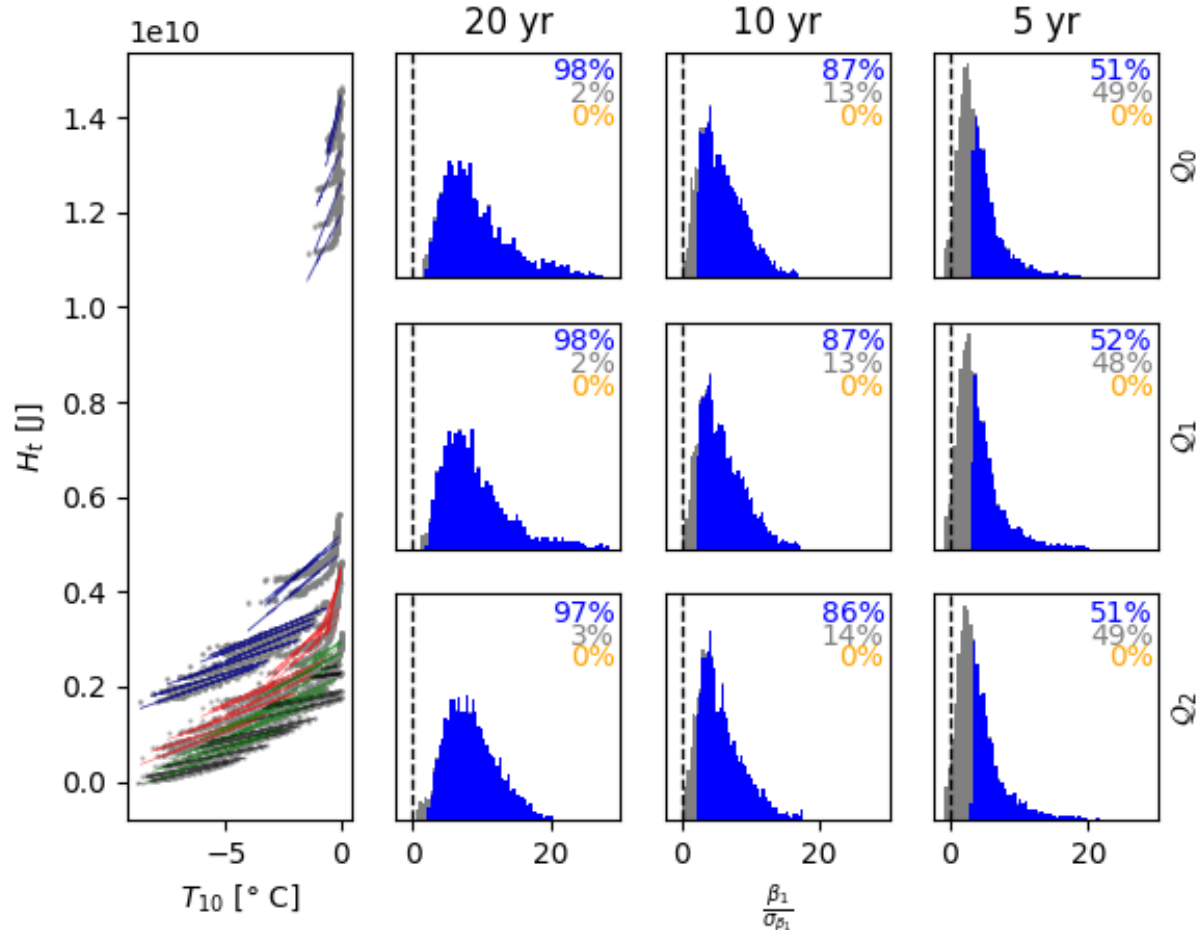

Figure S28: Effect of sensor quality and data length on the significance of metric ( ) - heat ( $H_t$ ) relationship. Larger t-values indicate a more reliable relationship between changes in metric and changes in heat content. More consistently positive or negative t-values demonstrate a less ambiguous interpretation from the metric.

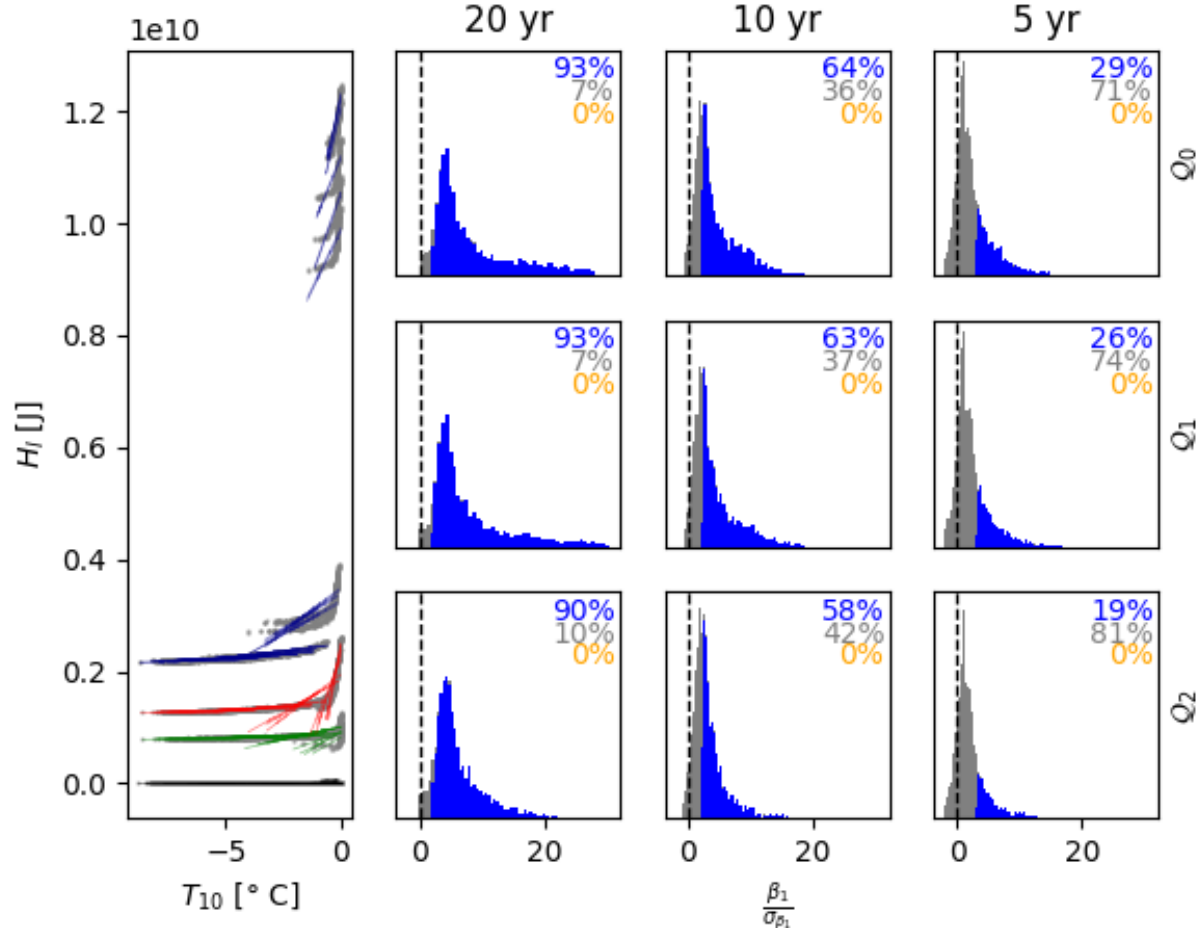

Figure S29: Effect of sensor quality and data length on the significance of metric ( $T_{10}$ ) - heat ( $H_t$ ) relationship. Larger t-values indicate a more reliable relationship between changes in metric and changes in heat content. More consistently positive or negative t-values demonstrate a less ambiguous interpretation from the metric.

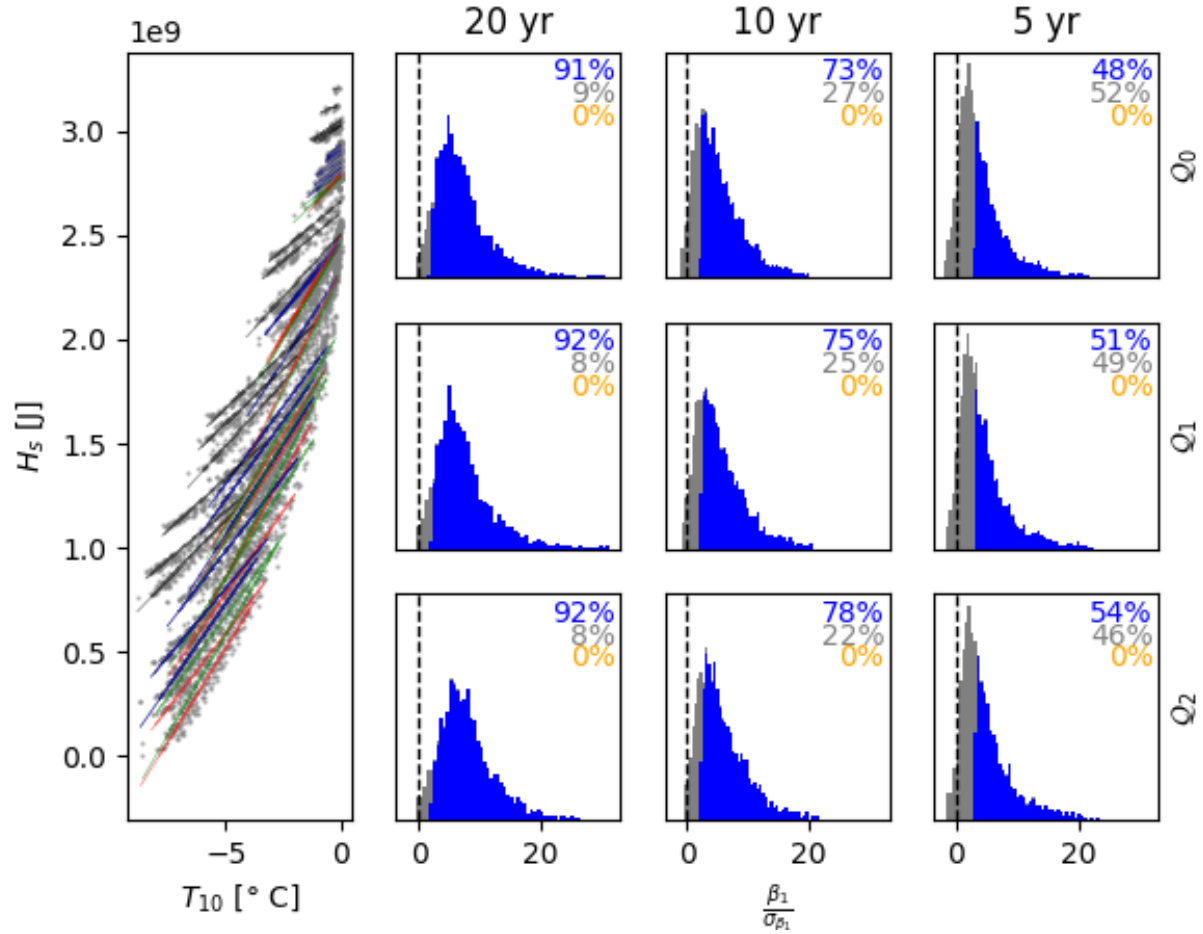

Figure S30: Effect of sensor quality and data length on the significance of metric ( $T_{10}$ ) - heat ( $H_s$ ) relationship. Larger t-values indicate a more reliable relationship between changes in metric and changes in heat content. More consistently positive or negative t-values demonstrate a less ambiguous interpretation from the metric.

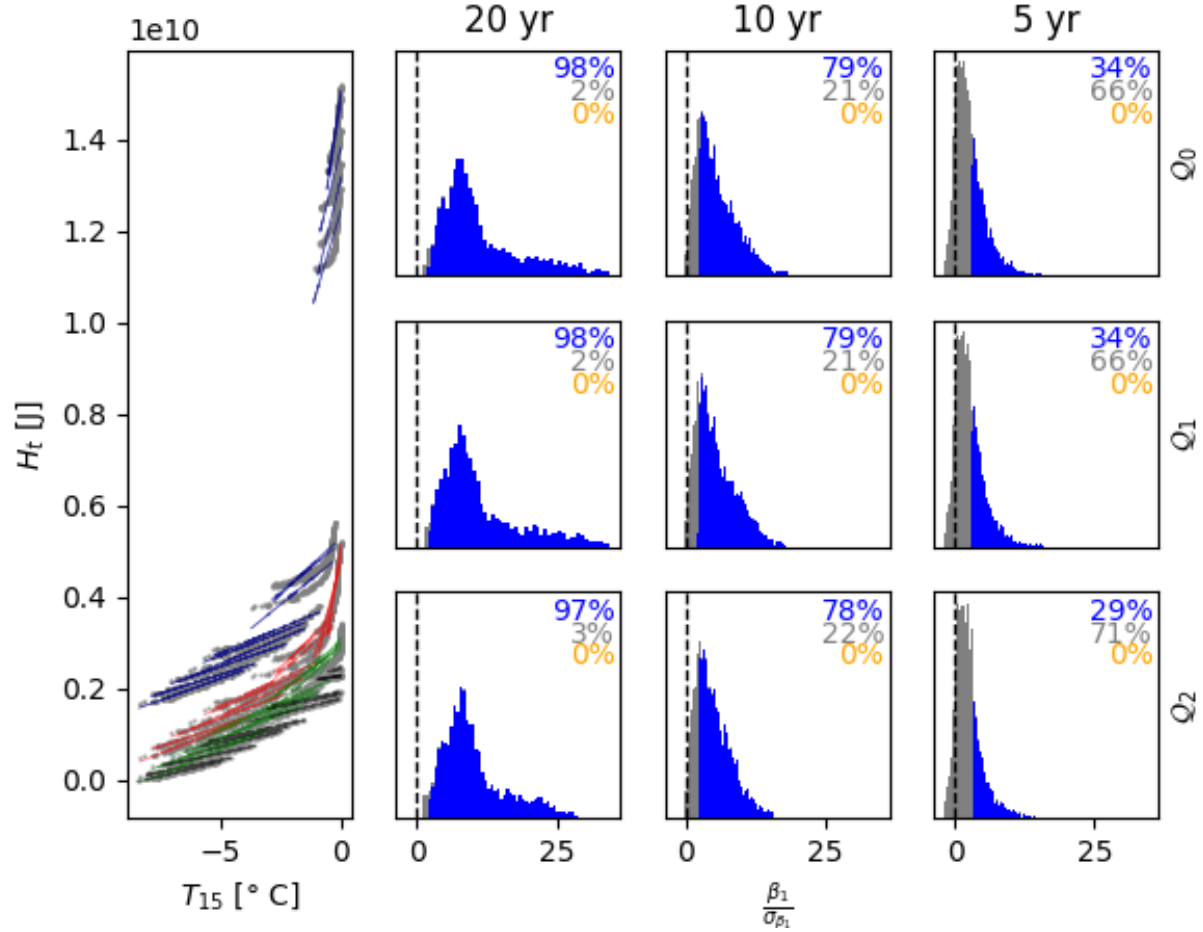

Figure S31: Effect of sensor quality and data length on the significance of metric ( $T_{15}$ ) - heat ( $H_t$ ) relationship. Larger t-values indicate a more reliable relationship between changes in metric and changes in heat content. More consistently positive or negative t-values demonstrate a less ambiguous interpretation from the metric.

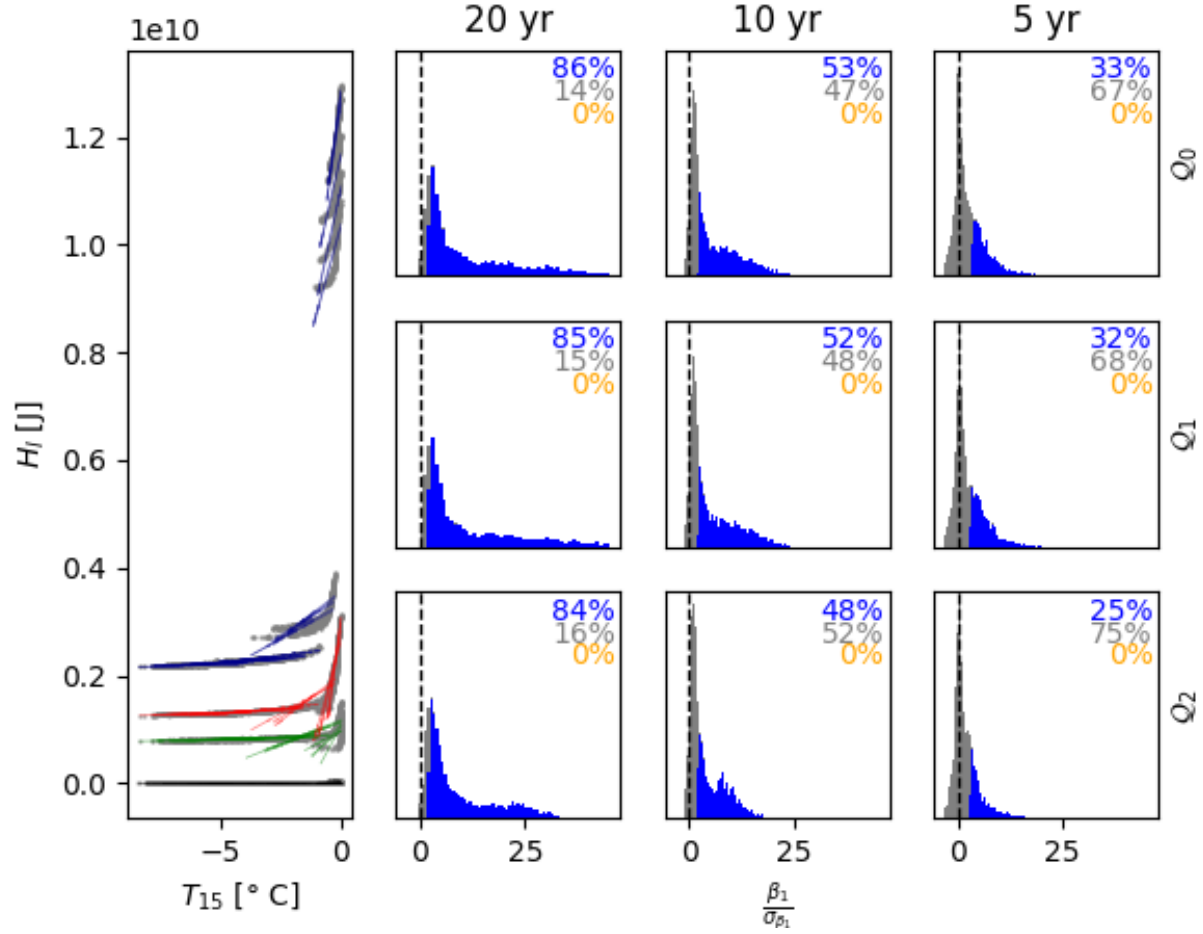

Figure S32: Effect of sensor quality and data length on the significance of metric ( $T_{15}$ ) - heat ( $H_l$ ) relationship. Larger t-values indicate a more reliable relationship between changes in metric and changes in heat content. More consistently positive or negative t-values demonstrate a less ambiguous interpretation from the metric.



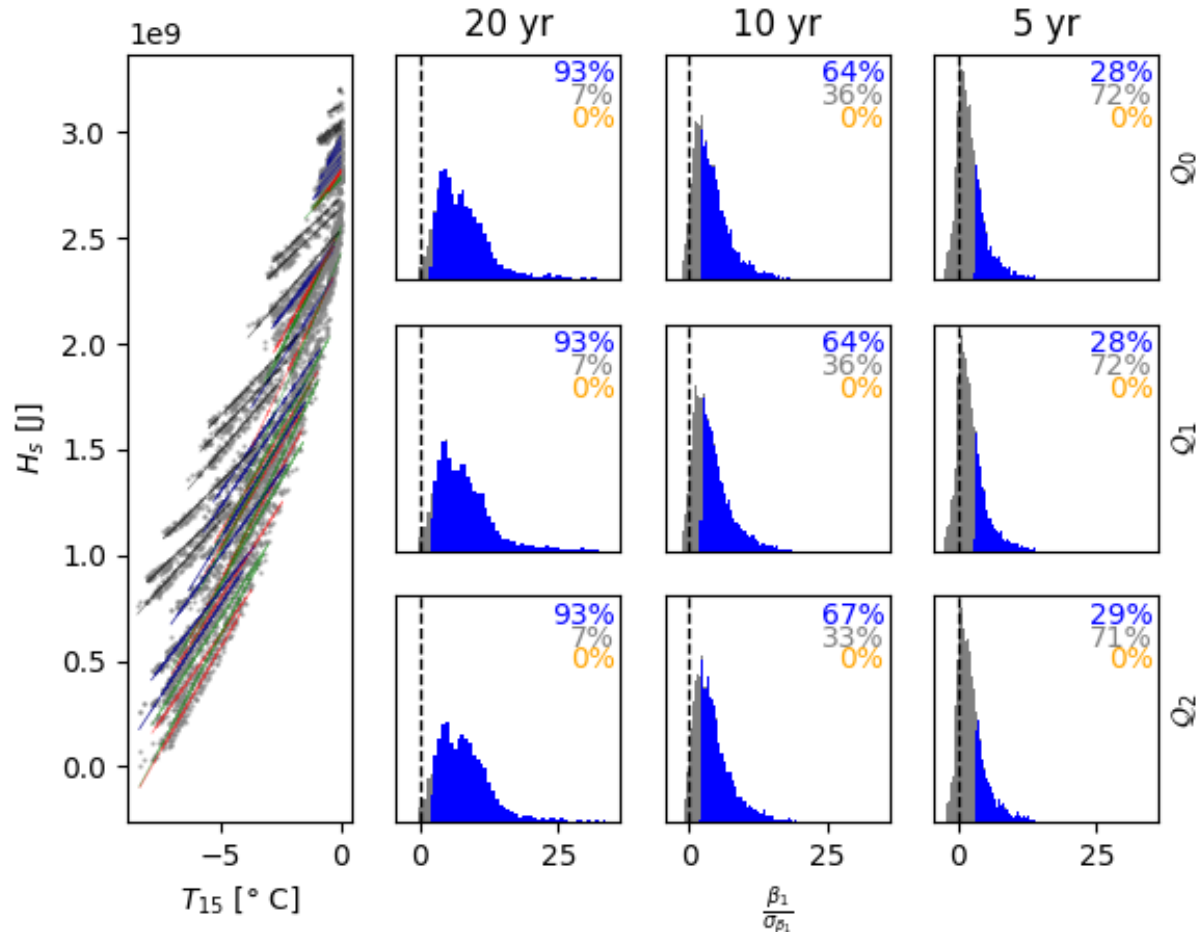

Figure S33: Effect of sensor quality and data length on the significance of metric ( $T_{15}$ ) - heat ( $H_s$ ) relationship. Larger t-values indicate a more reliable relationship between changes in metric and changes in heat content. More consistently positive or negative t-values demonstrate a less ambiguous interpretation from the metric.

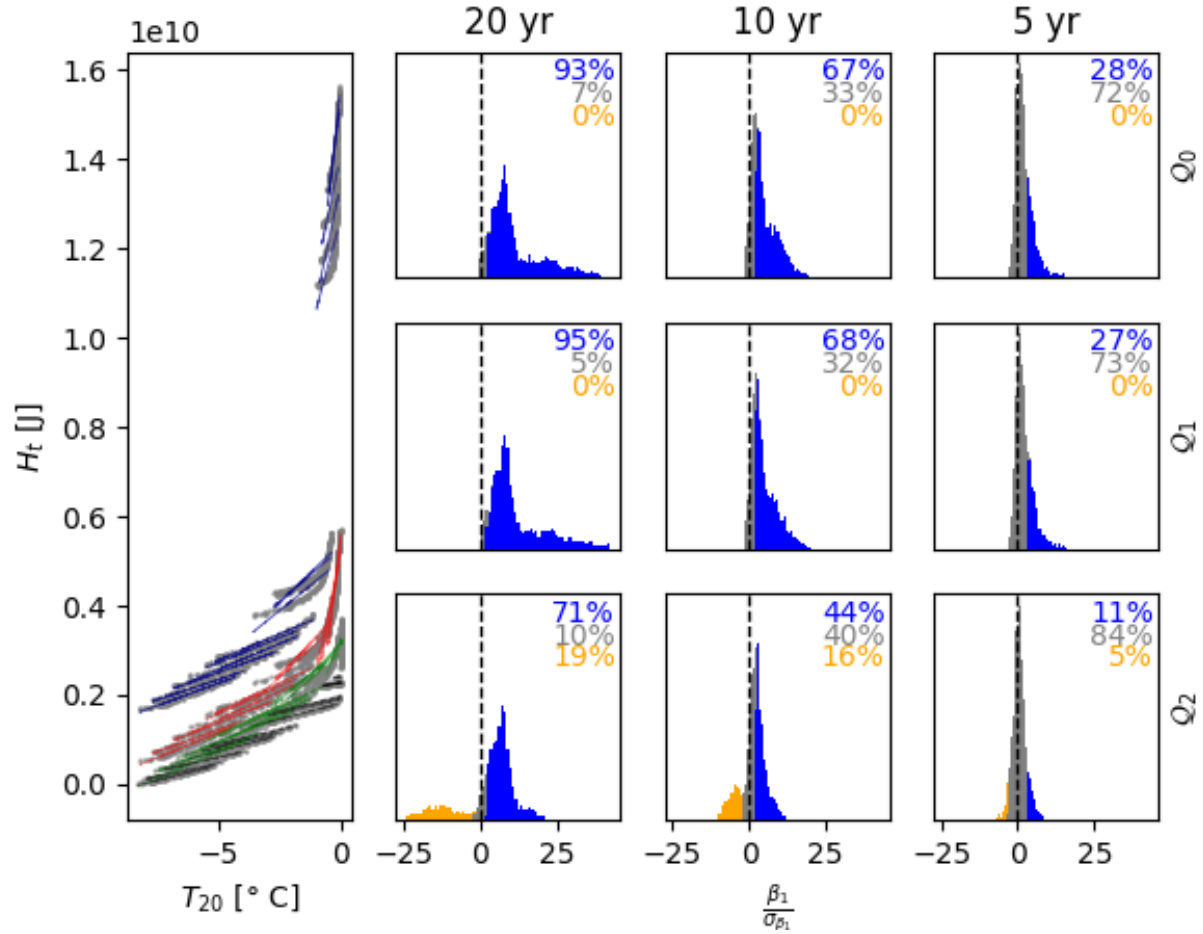

Figure S34: Effect of sensor quality and data length on the significance of metric ( $T_{20}$ ) - heat ( $H_t$ ) relationship. Larger t-values indicate a more reliable relationship between changes in metric and changes in heat content. More consistently positive or negative t-values demonstrate a less ambiguous interpretation from the metric.

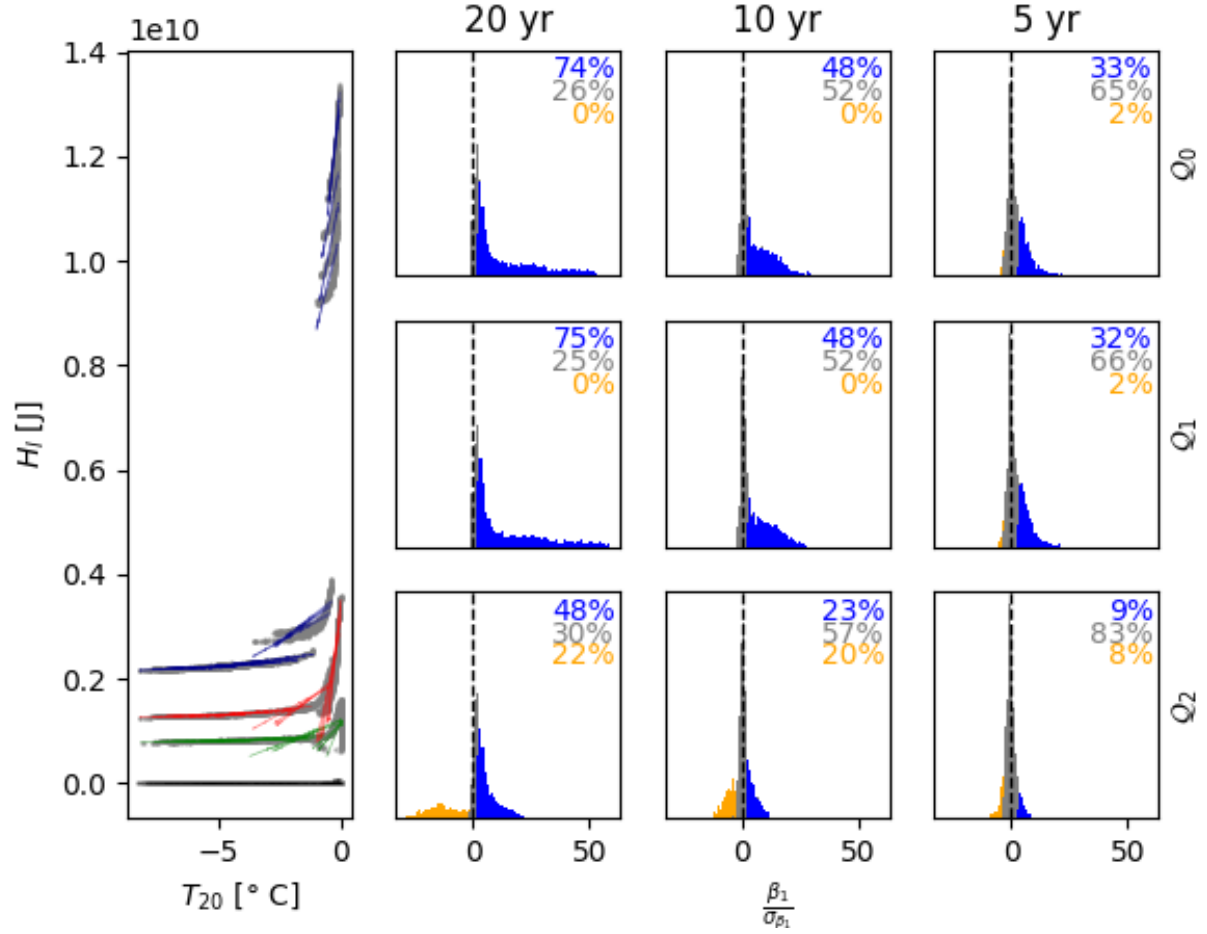

Figure S35: Effect of sensor quality and data length on the significance of metric ( $T_{20}$ ) - heat ( $H_t$ ) relationship. Larger t-values indicate a more reliable relationship between changes in metric and changes in heat content. More consistently positive or negative t-values demonstrate a less ambiguous interpretation from the metric.

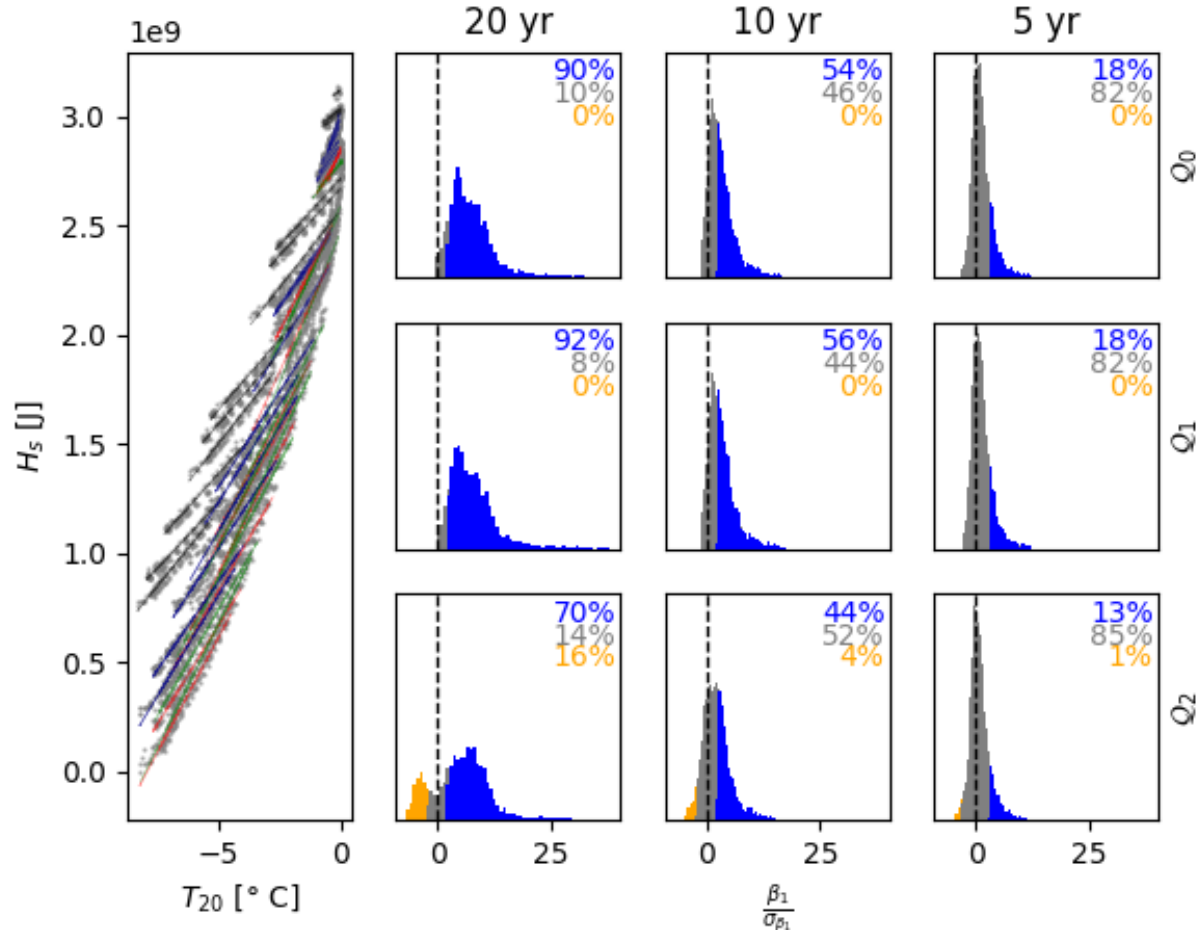

Figure S36: Effect of sensor quality and data length on the significance of metric ( $T_{20}$ ) - heat ( $H_s$ ) relationship. Larger t-values indicate a more reliable relationship between changes in metric and changes in heat content. More consistently positive or negative t-values demonstrate a less ambiguous interpretation from the metric.
