# Supplementary material for: Beyond MAGT: learning more from permafrost thermal monitoring data with additional metrics
Source: Copernicus journal article supplement (doi:10.5194/egusphere-2025-2658), 2025-08-06
Supplement: Supplementary file 2 [file Table_S1_colour.pdf › Table_S1_colour.pdf]

Table S1: Colourized version of Table 3 showing test statistics measuring how reliably each metric corresponds to the sensible, latent, or total ground heat content for a given averaging window and data quality. Numeric values represent the percentage of significantly positive (blue, left) or negative (orange, right) percentage relationships across all observation windows. The intensity of the colouring in each cell corresponds to its magnitude.

|       | Window Dataset      | 20 years |       |       | 10 years |       |       | 5 years |       |       | 20 years |       |       | 10 years |       |       | 5 years |       |       |
|-------|---------------------|----------|-------|-------|----------|-------|-------|---------|-------|-------|----------|-------|-------|----------|-------|-------|---------|-------|-------|
|       |                     | $Q_0$    | $Q_1$ | $Q_2$ | $Q_0$    | $Q_1$ | $Q_2$ | $Q_0$   | $Q_1$ | $Q_2$ | $Q_0$    | $Q_1$ | $Q_2$ | $Q_0$    | $Q_1$ | $Q_2$ | $Q_0$   | $Q_1$ | $Q_2$ |
| $H_l$ | <i>MAGST</i>        | 72       | 71    | 71    | 49       | 49    | 49    | 22      | 22    | 22    | 0        | 0     | 0     | 0        | 0     | 0     | 0       | 0     | 0     |
|       | $T_{10}$            | 93       | 92    | 90    | 64       | 62    | 57    | 28      | 26    | 18    | 0        | 0     | 0     | 0        | 0     | 0     | 0       | 0     | 0     |
|       | $T_{15}$            | 85       | 85    | 83    | 52       | 52    | 48    | 32      | 32    | 24    | 0        | 0     | 0     | 0        | 0     | 0     | 0       | 0     | 0     |
|       | $T_{20}$            | 73       | 75    | 48    | 47       | 47    | 23    | 32      | 32    | 9     | 0        | 0     | 22    | 0        | 0     | 19    | 1       | 2     | 8     |
|       | $\bar{\tau}_{10}^0$ | 88       | 88    | 88    | 57       | 57    | 56    | 27      | 27    | 27    | 0        | 0     | 0     | 0        | 0     | 0     | 0       | 0     | 0     |
|       | $\bar{\tau}_{15}^0$ | 90       | 90    | 90    | 57       | 57    | 57    | 26      | 26    | 26    | 0        | 0     | 0     | 0        | 0     | 0     | 0       | 0     | 0     |
|       | $\bar{\tau}_{20}^0$ | 90       | 90    | 90    | 57       | 57    | 56    | 26      | 26    | 25    | 0        | 0     | 0     | 0        | 0     | 0     | 0       | 0     | 0     |
|       | $d_{za}(warm)$      | 10       | 10    | 10    | 5        | 5     | 6     | 2       | 2     | 3     | 48       | 48    | 47    | 20       | 21    | 19    | 10      | 10    | 9     |
|       | $d_{za}$            | 44       | 44    | 44    | 32       | 32    | 32    | 14      | 14    | 14    | 22       | 22    | 24    | 9        | 9     | 10    | 4       | 4     | 4     |
|       | $d_{za}(cold)$      | 74       | 75    | 71    | 57       | 57    | 54    | 26      | 25    | 23    | 0        | 0     | 0     | 0        | 0     | 1     | 0       | 0     | 0     |
|       | $T_{za}$            | 59       | 59    | 55    | 32       | 34    | 26    | 14      | 14    | 11    | 0        | 0     | 4     | 1        | 0     | 2     | 1       | 1     | 1     |
|       | TOP                 | 96       | 97    | 86    | 90       | 91    | 68    | 57      | 55    | 38    | 0        | 0     | 0     | 0        | 0     | 0     | 0       | 0     | 0     |
| $H_s$ | <i>MAGST</i>        | 75       | 75    | 75    | 54       | 54    | 54    | 22      | 22    | 22    | 0        | 0     | 0     | 0        | 0     | 0     | 0       | 0     | 0     |
|       | $T_{10}$            | 91       | 91    | 92    | 72       | 75    | 78    | 48      | 50    | 54    | 0        | 0     | 0     | 0        | 0     | 0     | 0       | 0     | 0     |
|       | $T_{15}$            | 92       | 93    | 92    | 64       | 64    | 67    | 28      | 27    | 28    | 0        | 0     | 0     | 0        | 0     | 0     | 0       | 0     | 0     |
|       | $T_{20}$            | 90       | 92    | 70    | 54       | 55    | 44    | 17      | 17    | 13    | 0        | 0     | 16    | 0        | 0     | 4     | 0       | 0     | 1     |
|       | $\bar{\tau}_{10}^0$ | 96       | 96    | 95    | 81       | 81    | 80    | 66      | 66    | 65    | 0        | 0     | 0     | 0        | 0     | 0     | 0       | 0     | 0     |
|       | $\bar{\tau}_{15}^0$ | 98       | 98    | 98    | 85       | 85    | 85    | 71      | 71    | 71    | 0        | 0     | 0     | 0        | 0     | 0     | 0       | 0     | 0     |
|       | $\bar{\tau}_{20}^0$ | 99       | 99    | 99    | 89       | 89    | 88    | 74      | 74    | 74    | 0        | 0     | 0     | 0        | 0     | 0     | 0       | 0     | 0     |
|       | $d_{za}(warm)$      | 2        | 2     | 2     | 3        | 3     | 4     | 2       | 2     | 2     | 62       | 62    | 55    | 25       | 24    | 19    | 7       | 7     | 5     |
|       | $d_{za}$            | 29       | 29    | 30    | 24       | 24    | 25    | 16      | 15    | 16    | 26       | 26    | 24    | 10       | 10    | 8     | 2       | 2     | 2     |
|       | $d_{za}(cold)$      | 48       | 48    | 48    | 41       | 41    | 39    | 26      | 26    | 25    | 0        | 0     | 0     | 0        | 0     | 0     | 0       | 0     | 0     |
|       | $T_{za}$            | 68       | 70    | 68    | 47       | 47    | 42    | 20      | 20    | 18    | 2        | 1     | 4     | 2        | 1     | 1     | 1       | 0     | 0     |
|       | TOP                 | 78       | 78    | 64    | 39       | 38    | 34    | 18      | 17    | 16    | 0        | 0     | 0     | 0        | 0     | 0     | 0       | 0     | 0     |
| $H_t$ | <i>MAGST</i>        | 65       | 65    | 65    | 41       | 41    | 40    | 17      | 17    | 17    | 0        | 0     | 0     | 0        | 0     | 0     | 0       | 0     | 0     |
|       | $T_{10}$            | 97       | 98    | 96    | 86       | 86    | 86    | 51      | 51    | 50    | 0        | 0     | 0     | 0        | 0     | 0     | 0       | 0     | 0     |
|       | $T_{15}$            | 98       | 98    | 96    | 78       | 78    | 77    | 34      | 34    | 29    | 0        | 0     | 0     | 0        | 0     | 0     | 0       | 0     | 0     |
|       | $T_{20}$            | 93       | 95    | 71    | 67       | 68    | 43    | 27      | 27    | 11    | 0        | 0     | 18    | 0        | 0     | 16    | 0       | 0     | 4     |
|       | $\bar{\tau}_{10}^0$ | 94       | 94    | 93    | 69       | 69    | 68    | 50      | 50    | 50    | 0        | 0     | 0     | 0        | 0     | 0     | 0       | 0     | 0     |
|       | $\bar{\tau}_{15}^0$ | 97       | 97    | 97    | 75       | 75    | 75    | 55      | 55    | 55    | 0        | 0     | 0     | 0        | 0     | 0     | 0       | 0     | 0     |
|       | $\bar{\tau}_{20}^0$ | 98       | 98    | 98    | 79       | 79    | 78    | 58      | 58    | 58    | 0        | 0     | 0     | 0        | 0     | 0     | 0       | 0     | 0     |
|       | $d_{za}(warm)$      | 2        | 2     | 3     | 4        | 4     | 4     | 2       | 2     | 3     | 50       | 50    | 47    | 21       | 21    | 20    | 10      | 10    | 9     |
|       | $d_{za}$            | 34       | 34    | 34    | 29       | 29    | 29    | 18      | 18    | 18    | 20       | 20    | 21    | 9        | 9     | 9     | 4       | 4     | 3     |
|       | $d_{za}(cold)$      | 56       | 56    | 54    | 47       | 48    | 47    | 29      | 29    | 28    | 0        | 0     | 0     | 0        | 0     | 0     | 0       | 0     | 0     |
|       | $T_{za}$            | 77       | 77    | 71    | 51       | 52    | 45    | 22      | 22    | 18    | 0        | 0     | 3     | 0        | 0     | 1     | 0       | 0     | 1     |
|       | TOP                 | 87       | 88    | 71    | 61       | 62    | 45    | 33      | 32    | 20    | 0        | 0     | 0     | 0        | 0     | 0     | 0       | 0     | 0     |
